# Supplementary material
Source: publisher figshare collection journal article supplement (https://gsajournals.figshare.com/articles/dataset/_/11594187)
Supplement: Supplementary file 1 [file 1]

## Sheet: Table S10
Table S10	Table listing accession ID's of 1347 homologue spot pattern related proteins from Lepidoptera and corresponding M. jurtina homolouge protein match ID's.
Accession ID	Description	MJ Protein ID	E-Value	Bit-Score
AFK27932.1	Ecdysone receptor [Spodoptera litura]	g3041.t1	0	786.563
AIB07898.1	Hox cluster protein pb [Pararge aegeria]	g7251.t1	0	952.584
AIB07903.1	Hox cluster protein zen [Pararge aegeria]	g36031.t1	0	897.116
AON96649.1	ecdysone receptor [Bicyclus anynana]	g34800.t1	0	891.338
AON96649.1	ecdysone receptor [Bicyclus anynana]	g34800.t2	0	907.516
AON96649.1	ecdysone receptor [Bicyclus anynana]	g25044.t1	0	706.827
AON96649.1	ecdysone receptor [Bicyclus anynana]	g25044.t2	0	691.419
GBP59257.1	Transient receptor potential channel pyrexia [Eumeta japonica]	g35227.t1	0	799.66
KPI94668.1	Zinc finger CCCH domain-containing protein 13 [Papilio xuthus]	g6898.t1	0	791.571
KPI94668.1	Zinc finger CCCH domain-containing protein 13 [Papilio xuthus]	g5716.t1	0	536.184
KPI97326.1	Zinc finger CCCH domain-containing protein 18 [Papilio xuthus]	g5852.t1	0	1034.63
KPI98191.1	Zinc finger CCCH domain-containing protein 11A [Papilio xuthus]	g33214.t1	0	712.605
KPI98191.1	Zinc finger CCCH domain-containing protein 11A [Papilio xuthus]	g26800.t1	0	708.753
KPJ03457.1	Transient receptor potential channel pyrexia [Papilio xuthus]	g9858.t1	0	1510.74
KPJ08921.1	Transient receptor potential channel pyrexia [Papilio machaon]	g30204.t1	0	1633.62
OWR41469.1	putative coiled-coil and C2 domain containing 2A [Danaus plexippus plexippus]	g10354.t1	0	1273.07
OWR43524.1	multiple C2 and transmembrane domain-containing protein 1 [Danaus plexippus plexippus]	g22523.t1	0	604.749
OWR44146.1	spalt protein [Danaus plexippus plexippus]	g16974.t1	0	1594.33
OWR44146.1	spalt protein [Danaus plexippus plexippus]	g16989.t1	0	1598.18
OWR44543.1	Transmembrane and coiled-coil domain-containing protein 7 [Danaus plexippus plexippus]	g21021.t1	0	1117.45
OWR44543.1	Transmembrane and coiled-coil domain-containing protein 7 [Danaus plexippus plexippus]	g28468.t1	0	1113.98
OWR46025.1	ap endonuclease [Danaus plexippus plexippus]	g31374.t1	0	723.005
OWR46390.1	Phosphatidylinositol-4-phosphate 3-kinase C2 domain-containing beta polypeptide [Danaus plexippus plexippus]	g21375.t1	0	1996.48
OWR46938.1	WntA signaling ligand [Danaus plexippus plexippus]	g79.t1	0	565.459
OWR47439.1	putative C3 and PZP alpha-2-macroglobulin domain-containing protein 8 [Danaus plexippus plexippus]	g8340.t1	0	652.899
OWR47439.1	putative C3 and PZP alpha-2-macroglobulin domain-containing protein 8 [Danaus plexippus plexippus]	g4785.t1	0	1894.01
OWR47439.1	putative C3 and PZP alpha-2-macroglobulin domain-containing protein 8 [Danaus plexippus plexippus]	g19281.t1	0	1857.03
OWR52738.1	zinc finger CCCH domain-containing protein 10 isoform 1 [Danaus plexippus plexippus]	g26492.t1	0	650.973
XP_021205838.1	neutral ceramidase [Bombyx mori]	g31783.t1	0	974.926
XP_022837348.1	multiple C2 and transmembrane domain-containing protein isoform X4 [Spodoptera litura]	g8158.t1	0	615.15
XP_023934542.1	C2 domain-containing protein 5 isoform X2 [Bicyclus anynana]	g5575.t1	0	1046.96
XP_023934683.1	geranylgeranyl pyrophosphate synthase isoform X1 [Bicyclus anynana]	g21300.t1	0	513.072
XP_023934703.1	calcium-activated potassium channel slowpoke isoform X17 [Bicyclus anynana]	g29824.t1	0	2111.26
XP_023935201.1	transient receptor potential channel pyrexia [Bicyclus anynana]	g100.t1	0	747.273
XP_023936509.1	phosphoinositide 3-kinase adapter protein 1 isoform X2 [Bicyclus anynana]	g5421.t1	0	871.307
XP_023936518.1	phosphoinositide 3-kinase adapter protein 1 isoform X3 [Bicyclus anynana]	g5421.t2	0	563.918
XP_023936925.1	protein spaetzle 5 isoform X1 [Bicyclus anynana]	g7606.t1	0	614.379
XP_023938122.1	mothers against decapentaplegic homolog 3 isoform X1 [Bicyclus anynana]	g14020.t1	0	719.924
XP_023943354.1	protein naked cuticle homolog [Bicyclus anynana]	g14183.t1	0	732.635
XP_023944843.1	protein strawberry notch isoform X1 [Bicyclus anynana]	g16153.t1	0	1320.84
XP_023944843.1	protein strawberry notch isoform X1 [Bicyclus anynana]	g16154.t1	0	818.15
XP_023945739.1	transient receptor potential channel pyrexia [Bicyclus anynana]	g15701.t1	0	1028.47
XP_023946719.1	neurogenic locus Notch protein isoform X1 [Bicyclus anynana]	g31705.t1	0	3939.42
XP_023946720.1	neurogenic locus Notch protein isoform X2 [Bicyclus anynana]	g31705.t2	0	3928.64
XP_023946720.1	neurogenic locus Notch protein isoform X2 [Bicyclus anynana]	g27086.t1	0	1771.13
XP_023949747.1	protein mothers against dpp [Bicyclus anynana]	g31545.t1	0	876.315
XP_023953379.1	neurogenic locus notch homolog protein 1 isoform X1 [Bicyclus anynana]	g14980.t1	0	2099.32
XP_023953379.1	neurogenic locus notch homolog protein 1 isoform X1 [Bicyclus anynana]	g12285.t1	0	976.082
XP_023953379.1	neurogenic locus notch homolog protein 1 isoform X1 [Bicyclus anynana]	g12286.t1	0	1156.74
XP_023953386.1	neurogenic locus notch homolog protein 1 isoform X2 [Bicyclus anynana]	g14980.t2	0	2073.9
XP_023953386.1	neurogenic locus notch homolog protein 1 isoform X2 [Bicyclus anynana]	g12286.t2	0	1132.09
XP_023954728.1	suppressor APC domain-containing protein 2 [Bicyclus anynana]	g28106.t1	0	751.895
XP_023954728.1	suppressor APC domain-containing protein 2 [Bicyclus anynana]	g28106.t2	0	642.884
XP_023954728.1	suppressor APC domain-containing protein 2 [Bicyclus anynana]	g7006.t1	0	845.114
XP_023954787.1	neutral ceramidase isoform X1 [Bicyclus anynana]	g31784.t1	0	1343.18
XP_026324439.1	coiled-coil and C2 domain-containing protein 1-like isoform X2 [Hyposmocoma kahamanoa]	g29499.t1	0	568.54
XP_026483194.1	transient receptor potential channel pyrexia [Vanessa tameamea]	g101.t1	0	1177.54
XP_026484512.1	protein decapentaplegic [Vanessa tameamea]	g5417.t1	0	617.846
XP_026485276.1	mothers against decapentaplegic homolog 4 isoform X1 [Vanessa tameamea]	g2060.t1	0	1317.37
XP_026497379.1	C2 domain-containing protein 5 [Vanessa tameamea]	g5585.t1	0	1207.2
XP_026501079.1	neurogenic locus Notch protein [Vanessa tameamea]	g22596.t1	0	946.806
XP_026733734.1	zinc finger CCCH domain-containing protein 15 homolog [Trichoplusia ni]	g11115.t1	0	535.798
XP_028025674.1	LOW QUALITY PROTEIN: neurogenic locus notch homolog protein 2-like [Bombyx mandarina]	g21817.t1	0	1525.76
AIB07898.1	Hox cluster protein pb [Pararge aegeria]	g31961.t1	4.73e-178	503.442
XP_026324439.1	coiled-coil and C2 domain-containing protein 1-like isoform X2 [Hyposmocoma kahamanoa]	g5915.t1	8.26e-177	511.531
OWR44543.1	Transmembrane and coiled-coil domain-containing protein 7 [Danaus plexippus plexippus]	g32823.t1	5.38e-175	511.916
XP_023936792.1	protein spaetzle 3 [Bicyclus anynana]	g11434.t1	4.5e-173	485.337
XP_023948165.1	protein spaetzle 4 [Bicyclus anynana]	g24959.t1	1.27e-172	484.567
XP_023936792.1	protein spaetzle 3 [Bicyclus anynana]	g16407.t1	1.44e-172	484.182
XP_026485889.1	doublesex- and mab-3-related transcription factor A2 [Vanessa tameamea]	g36066.t1	1.22e-167	471.855
KPJ16192.1	Protein Optix [Papilio machaon]	g32283.t1	1.82e-166	458.373
AIB07900.1	Hox cluster protein ShxA [Pararge aegeria]	g36035.t1	2.43e-166	467.618
XP_023948165.1	protein spaetzle 4 [Bicyclus anynana]	g34381.t1	3.17e-163	460.685
KPI92475.1	Zinc finger CCCH domain-containing protein 14 [Papilio xuthus]	g12536.t1	4.45e-160	473.011
OWR44146.1	spalt protein [Danaus plexippus plexippus]	g16973.t1	1.42e-157	471.47
XP_023940821.1	doublesex- and mab-3-related transcription factor A2 [Bicyclus anynana]	g4710.t1	2.54e-156	436.417
XP_023940821.1	doublesex- and mab-3-related transcription factor A2 [Bicyclus anynana]	g20503.t1	3.64e-156	436.417
XP_023940821.1	doublesex- and mab-3-related transcription factor A2 [Bicyclus anynana]	g9072.t1	6.32e-156	435.261
AIB07911.1	Hox cluster protein Dfd [Polygonia c-album]	g35549.t1	4.86e-152	424.091
AIB07911.1	Hox cluster protein Dfd [Polygonia c-album]	g6309.t1	4.86e-152	424.091
XP_023936792.1	protein spaetzle 3 [Bicyclus anynana]	g24324.t1	9.81e-151	424.476
XP_023936792.1	protein spaetzle 3 [Bicyclus anynana]	g21289.t1	3.84e-150	424.861
XP_023936925.1	protein spaetzle 5 isoform X1 [Bicyclus anynana]	g35102.t1	7.35e-149	418.313
OWR46938.1	WntA signaling ligand [Danaus plexippus plexippus]	g17913.t1	4.18e-147	414.846
XP_023934683.1	geranylgeranyl pyrophosphate synthase isoform X1 [Bicyclus anynana]	g29822.t1	6.72e-147	409.838
OWR43523.1	black [Danaus plexippus plexippus]	g1343.t1	6.54e-144	414.846
OWR44543.1	Transmembrane and coiled-coil domain-containing protein 7 [Danaus plexippus plexippus]	g32822.t1	8.14e-143	421.779
XP_026483660.1	homeotic protein distal-less isoform X1 [Vanessa tameamea]	g2362.t2	4.67e-142	399.438
XP_026492788.1	calcium-activated potassium channel slowpoke isoform X9 [Vanessa tameamea]	g31805.t1	5.23e-142	421.779
XP_023946720.1	neurogenic locus Notch protein isoform X2 [Bicyclus anynana]	g27083.t1	1.65e-141	442.58
AIB07899.1	Hox cluster protein ShxB [Pararge aegeria]	g36034.t1	1.34e-140	402.519
OWR44586.1	B9 domain-containing protein 2 [Danaus plexippus plexippus]	g13039.t1	6.09e-138	412.92
XP_026492788.1	calcium-activated potassium channel slowpoke isoform X9 [Vanessa tameamea]	g31805.t3	1.37e-137	410.609
XP_022837345.1	multiple C2 and transmembrane domain-containing protein isoform X1 [Spodoptera litura]	g8166.t1	1.37e-136	400.979
KPI98191.1	Zinc finger CCCH domain-containing protein 11A [Papilio xuthus]	g11716.t1	2.99e-136	395.586
OWR50480.1	apterous B alpha [Danaus plexippus plexippus]	g14493.t1	3.14e-132	372.089
OWR45792.1	neurogenic locus notch protein 2 [Danaus plexippus plexippus]	g22634.t1	9.82e-132	389.808
XP_026324439.1	coiled-coil and C2 domain-containing protein 1-like isoform X2 [Hyposmocoma kahamanoa]	g23569.t1	3.87e-127	377.867
AIB07904.1	Hox cluster protein Dfd [Pararge aegeria]	g35158.t1	9.36e-127	360.533
JAA86179.1	DP transcription factor [Pararge aegeria]	g29376.t2	3.4e-126	361.688
JAA86179.1	DP transcription factor [Pararge aegeria]	g29376.t1	4.49e-126	361.303
XP_011550020.1	PREDICTED: phosphatidylinositol 4-phosphate 3-kinase C2 domain-containing subunit alpha-like [Plutella xylostella]	g21377.t1	2.55e-125	353.984
XP_021197962.1	neurogenic locus notch homolog protein 1 [Helicoverpa armigera]	g32635.t1	1.19e-124	400.593
XP_026492802.1	calcium-activated potassium channel slowpoke isoform X22 [Vanessa tameamea]	g31805.t2	1.99e-124	374.015
XP_023945739.1	transient receptor potential channel pyrexia [Bicyclus anynana]	g26995.t1	8.94e-124	369.392
XP_026483662.1	homeotic protein distal-less isoform X3 [Vanessa tameamea]	g2362.t1	1.71e-123	350.903
AFK27932.1	Ecdysone receptor [Spodoptera litura]	g1326.t1	9.87e-123	353.214
GBP73349.1	Neurogenic locus Notch protein [Eumeta japonica]	g5433.t1	2.52e-121	425.631
AFK27932.1	Ecdysone receptor [Spodoptera litura]	g1327.t1	1.1e-116	338.961
XP_023940559.1	neurogenic locus notch homolog protein 1 [Bicyclus anynana]	g26097.t1	1.52e-115	335.495
XP_023945739.1	transient receptor potential channel pyrexia [Bicyclus anynana]	g30948.t1	7.89e-114	342.813
XP_028033711.1	segmentation polarity homeobox protein engrailed [Bombyx mandarina]	g13207.t1	1.2e-109	318.161
XP_026497379.1	C2 domain-containing protein 5 [Vanessa tameamea]	g5573.t1	4.37e-109	344.354
KPJ12285.1	Zinc finger CCCH domain-containing protein 13 [Papilio machaon]	g5717.t1	4.74e-109	333.954
XP_023940559.1	neurogenic locus notch homolog protein 1 [Bicyclus anynana]	g18008.t1	7.36e-109	316.62
JAA89047.1	cortex [Pararge aegeria]	g2804.t1	7.77e-108	309.301
XP_026490799.1	protein cortex [Vanessa tameamea]	g13718.t1	1.87e-107	317.775
OWR49417.1	multiple C2 and transmembrane domain-containing protein 1 [Danaus plexippus plexippus]	g21578.t1	6.73e-107	315.079
OWR48139.1	Multiple C2 and transmembrane domain-containing protein 2 [Danaus plexippus plexippus]	g8164.t1	2.21e-106	322.783
AIB07902.1	Hox cluster protein ShxD [Pararge aegeria]	g36032.t1	3.47e-106	306.99
XP_022837347.1	multiple C2 and transmembrane domain-containing protein isoform X3 [Spodoptera litura]	g1461.t1	5.68e-106	318.546
AIB07904.1	Hox cluster protein Dfd [Pararge aegeria]	g35550.t1	2.05e-105	305.064
XP_026736064.1	homeobox protein engrailed [Trichoplusia ni]	g3824.t1	3.93e-104	310.842
XP_026736064.1	homeobox protein engrailed [Trichoplusia ni]	g21251.t1	1.91e-103	311.227
AIB07901.1	Hox cluster protein ShxC [Pararge aegeria]	g36033.t1	4.63e-103	297.36
XP_023954728.1	suppressor APC domain-containing protein 2 [Bicyclus anynana]	g31625.t1	5.79e-102	295.819
KPI98191.1	Zinc finger CCCH domain-containing protein 11A [Papilio xuthus]	g775.t1	2.07e-99	299.286
XP_023935832.1	doublesex- and mab-3-related transcription factor 2 [Bicyclus anynana]	g11790.t1	9e-93	265.388
XP_023946720.1	neurogenic locus Notch protein isoform X2 [Bicyclus anynana]	g2771.t1	3.41e-91	285.034
XP_026492784.1	calcium-activated potassium channel slowpoke isoform X5 [Vanessa tameamea]	g6040.t1	9.44e-91	282.722
BAN82533.1	doublesex [Lymantria dispar]	g6636.t1	1.68e-90	261.536
BAN82533.1	doublesex [Lymantria dispar]	g10033.t1	1.68e-90	261.536
OWR43523.1	black [Danaus plexippus plexippus]	g36008.t1	4.42e-90	272.322
OWR48139.1	Multiple C2 and transmembrane domain-containing protein 2 [Danaus plexippus plexippus]	g8159.t1	1.72e-89	275.018
OWR41021.1	EN protein binding/engrailed nuclear homeoprotein-regulated [Danaus plexippus plexippus]	g24884.t1	3.8e-88	268.085
KPJ12133.1	Zinc finger CCCH domain-containing protein 14 [Papilio machaon]	g11651.t1	4.82e-88	285.419
OWR50480.1	apterous B alpha [Danaus plexippus plexippus]	g14492.t1	7.05e-88	257.299
OWR50480.1	apterous B alpha [Danaus plexippus plexippus]	g14496.t1	7.05e-88	257.299
OWR44586.1	B9 domain-containing protein 2 [Danaus plexippus plexippus]	g13040.t1	5.25e-87	263.077
XP_026492785.1	calcium-activated potassium channel slowpoke isoform X6 [Vanessa tameamea]	g6040.t3	2.39e-86	271.552
XP_013198875.1	PREDICTED: B9 domain-containing protein 1 [Amyelois transitella]	g35738.t1	1.77e-83	249.595
OWR46390.1	Phosphatidylinositol-4-phosphate 3-kinase C2 domain-containing beta polypeptide [Danaus plexippus plexippus]	g1545.t1	1.18e-82	286.574
OWR46390.1	Phosphatidylinositol-4-phosphate 3-kinase C2 domain-containing beta polypeptide [Danaus plexippus plexippus]	g1545.t2	3.18e-82	286.96
XP_022118144.1	protein spaetzle isoform X1 [Pieris rapae]	g28935.t2	1.71e-81	239.58
AAB46364.1	invected homeodomain protein [Junonia coenia]	g13209.t1	9.28e-80	228.409
KPJ12133.1	Zinc finger CCCH domain-containing protein 14 [Papilio machaon]	g12535.t1	2.09e-79	256.144
OWR46938.1	WntA signaling ligand [Danaus plexippus plexippus]	g26693.t1	3.74e-78	238.039
KPJ07178.1	Zinc finger CCCH domain-containing protein 3 [Papilio machaon]	g15868.t1	4.49e-78	251.521
XP_026492810.1	calcium-activated potassium channel slowpoke isoform X29 [Vanessa tameamea]	g6040.t2	1.03e-77	245.743
XP_026497379.1	C2 domain-containing protein 5 [Vanessa tameamea]	g5587.t1	1.34e-76	243.047
OWR46938.1	WntA signaling ligand [Danaus plexippus plexippus]	g7026.t1	1.83e-75	231.106
XP_026497379.1	C2 domain-containing protein 5 [Vanessa tameamea]	g5574.t1	4.96e-75	239.965
KOB74209.1	Vermilion [Operophtera brumata]	g3330.t1	1.17e-74	231.876
ABD36115.1	EN protein binding/engrailed nuclear homeoprotein-regulated protein [Bombyx mori]	g24886.t1	7.96e-74	234.187
XP_023945739.1	transient receptor potential channel pyrexia [Bicyclus anynana]	g14157.t1	8.72e-74	239.965
OWR47439.1	putative C3 and PZP alpha-2-macroglobulin domain-containing protein 8 [Danaus plexippus plexippus]	g13248.t1	2.35e-73	236.498
GBP18927.1	Calcium-activated potassium channel slowpoke [Eumeta japonica]	g6067.t1	2.29e-71	206.838
XP_022118144.1	protein spaetzle isoform X1 [Pieris rapae]	g7589.t1	3.22e-71	213.386
OWR46938.1	WntA signaling ligand [Danaus plexippus plexippus]	g26691.t1	3.45e-71	220.705
KPJ16192.1	Protein Optix [Papilio machaon]	g12432.t1	4.14e-71	214.542
XP_022118144.1	protein spaetzle isoform X1 [Pieris rapae]	g28935.t1	1.31e-70	211.075
KPJ16192.1	Protein Optix [Papilio machaon]	g24717.t1	2.48e-70	217.238
OWR49417.1	multiple C2 and transmembrane domain-containing protein 1 [Danaus plexippus plexippus]	g21638.t1	7.02e-70	219.55
OWR46938.1	WntA signaling ligand [Danaus plexippus plexippus]	g23951.t1	2.81e-69	217.238
ABD36115.1	EN protein binding/engrailed nuclear homeoprotein-regulated protein [Bombyx mori]	g11997.t1	3.18e-69	217.624
XP_013144227.1	PREDICTED: neurogenic locus Notch protein [Papilio polytes]	g13685.t1	1.7e-68	239.58
XP_013144227.1	PREDICTED: neurogenic locus Notch protein [Papilio polytes]	g1810.t1	1.75e-68	239.195
GBP73349.1	Neurogenic locus Notch protein [Eumeta japonica]	g25904.t1	4.51e-68	233.417
OWR43524.1	multiple C2 and transmembrane domain-containing protein 1 [Danaus plexippus plexippus]	g23807.t1	6.83e-68	215.312
XP_026736064.1	homeobox protein engrailed [Trichoplusia ni]	g2365.t1	4.11e-66	204.142
XP_026736064.1	homeobox protein engrailed [Trichoplusia ni]	g2367.t1	4.76e-66	203.756
KPI96640.1	Segmentation polarity homeobox protein engrailed [Papilio xuthus]	g13208.t1	2.14e-65	190.274
AFK27932.1	Ecdysone receptor [Spodoptera litura]	g11077.t1	2.42e-65	202.216
AIB07898.1	Hox cluster protein pb [Pararge aegeria]	g31960.t1	2.22e-63	202.216
KPI96643.1	Homeobox protein invected [Papilio xuthus]	g13210.t1	8.31e-63	199.519
OWR43524.1	multiple C2 and transmembrane domain-containing protein 1 [Danaus plexippus plexippus]	g23806.t1	3.96e-62	200.675
XP_021197962.1	neurogenic locus notch homolog protein 1 [Helicoverpa armigera]	g15049.t1	4.43e-62	218.779
XP_021205838.1	neutral ceramidase [Bombyx mori]	g31781.t1	3.56e-61	201.06
XP_023946720.1	neurogenic locus Notch protein isoform X2 [Bicyclus anynana]	g27088.t1	3.6e-59	191.815
AFK27932.1	Ecdysone receptor [Spodoptera litura]	g17446.t1	5.44e-59	197.593
AFK27932.1	Ecdysone receptor [Spodoptera litura]	g19433.t1	4.14e-58	193.356
XP_013144227.1	PREDICTED: neurogenic locus Notch protein [Papilio polytes]	g25396.t1	1.45e-57	213.001
AEP43793.2	black [Biston betularia]	g34458.t1	1.85e-56	194.512
OWR48057.1	geranylgeranyl pyrophosphate synthase like protein [Danaus plexippus plexippus]	g10561.t1	3.28e-56	174.096
XP_022125911.1	neurogenic locus Notch protein isoform X2 [Pieris rapae]	g11029.t1	9.88e-56	211.075
KPJ12133.1	Zinc finger CCCH domain-containing protein 14 [Papilio machaon]	g12534.t1	2.13e-55	182.185
OWR47439.1	putative C3 and PZP alpha-2-macroglobulin domain-containing protein 8 [Danaus plexippus plexippus]	g13247.t1	4.41e-55	181.03
KPJ16192.1	Protein Optix [Papilio machaon]	g353.t1	5.6e-55	171.785
OWR46938.1	WntA signaling ligand [Danaus plexippus plexippus]	g20481.t1	2.79e-54	180.644
OWR49417.1	multiple C2 and transmembrane domain-containing protein 1 [Danaus plexippus plexippus]	g21637.t1	5.79e-54	176.792
OWR49417.1	multiple C2 and transmembrane domain-containing protein 1 [Danaus plexippus plexippus]	g21577.t1	1.06e-53	177.563
XP_026736064.1	homeobox protein engrailed [Trichoplusia ni]	g12098.t1	2.54e-53	176.407
OWR49417.1	multiple C2 and transmembrane domain-containing protein 1 [Danaus plexippus plexippus]	g24336.t1	2.8e-52	167.933
XP_021196407.1	doublesex- and mab-3-related transcription factor A2 isoform X4 [Helicoverpa armigera]	g28786.t1	8.6e-51	159.844
KPJ14946.1	Transient receptor potential channel pyrexia [Papilio machaon]	g1447.t1	1.4e-50	171.785
OWR46938.1	WntA signaling ligand [Danaus plexippus plexippus]	g26695.t1	9.21e-50	166.777
KPI91854.1	Zinc finger CCCH domain-containing protein 10 [Papilio xuthus]	g5739.t1	2.78e-48	167.548
XP_026324439.1	coiled-coil and C2 domain-containing protein 1-like isoform X2 [Hyposmocoma kahamanoa]	g23570.t1	7.22e-48	166.777
XP_028158264.1	neurogenic locus Notch protein isoform X7 [Ostrinia furnacalis]	g6841.t1	8.87e-48	176.022
KPI91854.1	Zinc finger CCCH domain-containing protein 10 [Papilio xuthus]	g27455.t1	2.57e-47	160.614
AIB07911.1	Hox cluster protein Dfd [Polygonia c-album]	g35157.t1	1.02e-46	150.214
OWR48057.1	geranylgeranyl pyrophosphate synthase like protein [Danaus plexippus plexippus]	g22390.t1	3.06e-46	147.902
KPJ09176.1	Zinc finger CCCH domain-containing protein 10 [Papilio machaon]	g25289.t1	3.25e-46	160.999
XP_013185356.1	PREDICTED: neurogenic locus Notch protein isoform X1 [Amyelois transitella]	g16576.t1	1.38e-45	176.407
BAK19083.1	apterous A splicing isoform type F [Bombyx mori]	g25569.t1	1.76e-45	138.658
GBO98634.1	Ectoderm-neural cortex protein 1 [Eumeta japonica]	g7787.t1	1.86e-45	160.614
OWR46938.1	WntA signaling ligand [Danaus plexippus plexippus]	g33091.t1	1.96e-45	151.754
XP_023934542.1	C2 domain-containing protein 5 isoform X2 [Bicyclus anynana]	g26719.t1	5.11e-45	150.214
BAI87832.1	black [Papilio xuthus]	g16297.t1	1.69e-44	151.754
XP_026501286.1	protein strawberry notch isoform X3 [Vanessa tameamea]	g16155.t1	2.87e-44	151.754
XP_026501079.1	neurogenic locus Notch protein [Vanessa tameamea]	g27085.t1	3.46e-43	146.362
OWR48056.1	geranylgeranyl pyrophosphate synthase like protein [Danaus plexippus plexippus]	g20374.t1	5.48e-43	139.043
XP_023946720.1	neurogenic locus Notch protein isoform X2 [Bicyclus anynana]	g23881.t1	1.23e-42	144.436
OWR46390.1	Phosphatidylinositol-4-phosphate 3-kinase C2 domain-containing beta polypeptide [Danaus plexippus plexippus]	g14303.t1	1.36e-42	157.918
XP_012545814.1	transient receptor potential channel pyrexia isoform X2 [Bombyx mori]	g25033.t1	1.41e-42	165.236
KPI95412.1	Neurogenic locus Notch protein [Papilio xuthus]	g27084.t1	1.75e-42	144.05
XP_028157770.1	ligand of Numb protein X 2-like [Ostrinia furnacalis]	g5940.t2	2.96e-42	142.51
XP_026324002.1	neurogenic locus Notch protein isoform X6 [Hyposmocoma kahamanoa]	g11412.t1	5.39e-42	164.851
KPJ12133.1	Zinc finger CCCH domain-containing protein 14 [Papilio machaon]	g27378.t1	7e-42	144.821
XP_028157770.1	ligand of Numb protein X 2-like [Ostrinia furnacalis]	g5940.t1	7.23e-42	142.895
AEP43793.2	black [Biston betularia]	g30233.t1	3.72e-41	140.584
OWR48056.1	geranylgeranyl pyrophosphate synthase like protein [Danaus plexippus plexippus]	g29328.t1	4.65e-41	137.117
XP_023938124.1	mothers against decapentaplegic homolog 3 isoform X3 [Bicyclus anynana]	g10707.t1	6.06e-41	135.191
XP_023934542.1	C2 domain-containing protein 5 isoform X2 [Bicyclus anynana]	g5572.t1	6.4e-40	136.346
KPJ09094.1	Protein apterous [Papilio machaon]	g5698.t1	2.83e-39	124.79
XP_023944813.1	mothers against decapentaplegic homolog 6 [Bicyclus anynana]	g14542.t1	3.56e-39	132.494
XP_026495261.1	LOW QUALITY PROTEIN: ecdysone receptor [Vanessa tameamea]	g10735.t1	7.4e-39	133.65
OWR48541.1	spaetzle 1-2 [Danaus plexippus plexippus]	g25459.t1	1.36e-38	126.716
XP_011569112.1	PREDICTED: neurogenic locus Notch protein [Plutella xylostella]	g15635.t1	1.71e-38	147.132
KOB77902.1	Transient receptor potential channel pyrexia [Operophtera brumata]	g34126.t1	3.23e-38	150.599
XP_023945739.1	transient receptor potential channel pyrexia [Bicyclus anynana]	g15700.t2	3.23e-38	130.568
AFK27932.1	Ecdysone receptor [Spodoptera litura]	g13377.t1	6.86e-38	140.969
AFK27932.1	Ecdysone receptor [Spodoptera litura]	g24456.t1	1.09e-37	139.043
OWR43715.1	Zinc finger CCCH domain-containing protein 10 [Danaus plexippus plexippus]	g33470.t1	3.02e-37	126.716
GBP73349.1	Neurogenic locus Notch protein [Eumeta japonica]	g6887.t1	5.33e-37	142.895
GBP73352.1	Neurogenic locus Notch protein [Eumeta japonica]	g31704.t1	4.09e-36	122.094
KPI92475.1	Zinc finger CCCH domain-containing protein 14 [Papilio xuthus]	g5629.t1	4.93e-36	124.02
OWR43523.1	black [Danaus plexippus plexippus]	g18267.t1	5.77e-36	132.109
XP_028158264.1	neurogenic locus Notch protein isoform X7 [Ostrinia furnacalis]	g34750.t1	6.38e-36	140.584
XP_028158264.1	neurogenic locus Notch protein isoform X7 [Ostrinia furnacalis]	g6229.t1	8.61e-36	140.584
OWR46938.1	WntA signaling ligand [Danaus plexippus plexippus]	g30054.t1	1.21e-35	127.102
OWR46938.1	WntA signaling ligand [Danaus plexippus plexippus]	g25053.t1	1.53e-35	121.709
XP_023945739.1	transient receptor potential channel pyrexia [Bicyclus anynana]	g15700.t1	4.61e-35	123.25
OWR42582.1	spaetzle [Danaus plexippus plexippus]	g31487.t1	4.7e-35	120.553
AFK27932.1	Ecdysone receptor [Spodoptera litura]	g3359.t1	6e-35	123.635
BAI87832.1	black [Papilio xuthus]	g15236.t1	6.94e-35	134.035
AFK27932.1	Ecdysone receptor [Spodoptera litura]	g1952.t1	3.86e-34	124.405
AFK27932.1	Ecdysone receptor [Spodoptera litura]	g17915.t1	7.61e-34	126.331
XP_026483662.1	homeotic protein distal-less isoform X3 [Vanessa tameamea]	g18317.t1	8.94e-34	115.546
OWR46390.1	Phosphatidylinositol-4-phosphate 3-kinase C2 domain-containing beta polypeptide [Danaus plexippus plexippus]	g19011.t1	9.97e-34	137.887
XP_013165317.1	PREDICTED: neurogenic locus notch homolog protein 3-like [Papilio xuthus]	g30815.t1	3.83e-33	128.642
XP_023946720.1	neurogenic locus Notch protein isoform X2 [Bicyclus anynana]	g35830.t1	5.73e-33	115.546
XP_022112667.1	ecdysone receptor isoform X3 [Pieris rapae]	g2829.t1	1.27e-32	125.561
KPJ01466.1	Protein doublesex [Papilio xuthus]	g6635.t1	3.06e-32	104.76
OWR48139.1	Multiple C2 and transmembrane domain-containing protein 2 [Danaus plexippus plexippus]	g8165.t1	3.5e-32	116.316
XP_022819190.1	neurogenic locus Notch protein isoform X2 [Spodoptera litura]	g11411.t1	3.61e-32	129.413
XP_026760526.1	transient receptor potential channel pyrexia isoform X1 [Galleria mellonella]	g33765.t1	5.52e-32	126.716
KPJ01466.1	Protein doublesex [Papilio xuthus]	g31557.t1	9.37e-32	104.375
AIB07881.1	Hox protein Dfd [Callimorpha dominula]	g9972.t1	9.54e-32	118.627
BAI87832.1	black [Papilio xuthus]	g25313.t1	1.48e-31	125.176
XP_026323998.1	neurogenic locus Notch protein isoform X2 [Hyposmocoma kahamanoa]	g12162.t1	1.62e-31	132.109
XP_022837345.1	multiple C2 and transmembrane domain-containing protein isoform X1 [Spodoptera litura]	g31433.t1	3.13e-31	110.153
XP_026330044.1	ecdysone receptor isoform X1 [Hyposmocoma kahamanoa]	g32132.t1	4.03e-31	125.176
AFK27932.1	Ecdysone receptor [Spodoptera litura]	g16848.t1	4.52e-31	115.931
AEP43793.2	black [Biston betularia]	g7859.t1	4.63e-31	122.479
OWR46938.1	WntA signaling ligand [Danaus plexippus plexippus]	g32953.t1	7.72e-31	110.538
XP_011569112.1	PREDICTED: neurogenic locus Notch protein [Plutella xylostella]	g8054.t1	2.43e-30	126.716
KOB77902.1	Transient receptor potential channel pyrexia [Operophtera brumata]	g27707.t1	2.63e-30	126.716
AFK27932.1	Ecdysone receptor [Spodoptera litura]	g1032.t1	3.94e-30	116.701
XP_021195084.1	neurogenic locus Notch protein isoform X4 [Helicoverpa armigera]	g21283.t1	6.53e-30	126.331
XP_026315092.1	transient receptor potential channel pyrexia [Hyposmocoma kahamanoa]	g7563.t1	7.98e-30	122.479
XP_023934700.1	calcium-activated potassium channel slowpoke isoform X14 [Bicyclus anynana]	g897.t1	1.43e-29	122.094
XP_023934700.1	calcium-activated potassium channel slowpoke isoform X14 [Bicyclus anynana]	g897.t2	1.56e-29	122.094
XP_013197540.1	PREDICTED: neurogenic locus notch homolog protein 3-like [Amyelois transitella]	g30814.t1	2.79e-29	108.227
AFK27932.1	Ecdysone receptor [Spodoptera litura]	g24638.t1	2.83e-29	117.087
AIB07904.1	Hox cluster protein Dfd [Pararge aegeria]	g12830.t1	5.3e-29	114.005
AIB07881.1	Hox protein Dfd [Callimorpha dominula]	g12828.t1	6.22e-29	114.005
OWR50479.1	apterous A splicing isoform type B [Danaus plexippus plexippus]	g16476.t1	1.4e-28	108.997
OWR47439.1	putative C3 and PZP alpha-2-macroglobulin domain-containing protein 8 [Danaus plexippus plexippus]	g17748.t1	1.4e-28	104.375
XP_028025674.1	LOW QUALITY PROTEIN: neurogenic locus notch homolog protein 2-like [Bombyx mandarina]	g22205.t1	1.73e-28	117.857
XP_028025674.1	LOW QUALITY PROTEIN: neurogenic locus notch homolog protein 2-like [Bombyx mandarina]	g28591.t1	3.34e-28	117.857
XP_011564306.1	PREDICTED: ecdysone receptor [Plutella xylostella]	g15444.t1	3.95e-28	108.227
XP_021197962.1	neurogenic locus notch homolog protein 1 [Helicoverpa armigera]	g19522.t1	4.14e-28	110.923
KPJ14563.1	Neurogenic locus Notch protein [Papilio machaon]	g36260.t1	5.48e-28	119.783
OWR52738.1	zinc finger CCCH domain-containing protein 10 isoform 1 [Danaus plexippus plexippus]	g26360.t1	5.86e-28	105.145
XP_012551411.1	apterous A isoform X3 [Bombyx mori]	g28851.t1	1.14e-27	105.145
OWR46390.1	Phosphatidylinositol-4-phosphate 3-kinase C2 domain-containing beta polypeptide [Danaus plexippus plexippus]	g18613.t1	1.16e-27	98.9821
XP_013184439.1	PREDICTED: transient receptor potential channel pyrexia isoform X2 [Amyelois transitella]	g12977.t1	1.64e-27	117.472
XP_012551411.1	apterous A isoform X3 [Bombyx mori]	g3672.t1	1.77e-27	104.76
OWR46390.1	Phosphatidylinositol-4-phosphate 3-kinase C2 domain-containing beta polypeptide [Danaus plexippus plexippus]	g4906.t1	6.06e-27	113.62
AFK27932.1	Ecdysone receptor [Spodoptera litura]	g24638.t2	9.17e-27	109.768
XP_023946720.1	neurogenic locus Notch protein isoform X2 [Bicyclus anynana]	g33736.t1	9.94e-27	111.694
KPJ12133.1	Zinc finger CCCH domain-containing protein 14 [Papilio machaon]	g11650.t1	1.67e-26	98.9821
OWR46390.1	Phosphatidylinositol-4-phosphate 3-kinase C2 domain-containing beta polypeptide [Danaus plexippus plexippus]	g16908.t1	2.05e-26	112.849
XP_026484512.1	protein decapentaplegic [Vanessa tameamea]	g18138.t1	2.16e-26	102.834
XP_028165626.1	protein decapentaplegic [Ostrinia furnacalis]	g34330.t1	3.02e-26	103.605
BAH83638.1	Notch [Bombyx mori]	g17223.t1	3.57e-26	113.62
AFK27932.1	Ecdysone receptor [Spodoptera litura]	g28458.t1	3.89e-26	99.7525
AFK27932.1	Ecdysone receptor [Spodoptera litura]	g28849.t1	3.89e-26	99.7525
AFK27932.1	Ecdysone receptor [Spodoptera litura]	g5328.t1	4.23e-26	107.071
XP_028158264.1	neurogenic locus Notch protein isoform X7 [Ostrinia furnacalis]	g3434.t1	6.75e-26	105.531
AFK27932.1	Ecdysone receptor [Spodoptera litura]	g12994.t1	1.63e-25	98.5969
OWR46390.1	Phosphatidylinositol-4-phosphate 3-kinase C2 domain-containing beta polypeptide [Danaus plexippus plexippus]	g18537.t1	2.58e-25	109.383
XP_026315516.1	protein decapentaplegic [Hyposmocoma kahamanoa]	g17632.t1	2.91e-25	93.9745
XP_013135766.1	PREDICTED: transient receptor potential channel pyrexia isoform X1 [Papilio polytes]	g35791.t1	3.62e-25	99.7525
XP_014372144.1	PREDICTED: transient receptor potential channel pyrexia [Papilio machaon]	g21959.t2	1.47e-24	108.997
XP_013184439.1	PREDICTED: transient receptor potential channel pyrexia isoform X2 [Amyelois transitella]	g21959.t1	1.72e-24	108.612
OWR43523.1	black [Danaus plexippus plexippus]	g34461.t1	2.16e-24	89.7373
XP_026735244.1	transient receptor potential channel pyrexia [Trichoplusia ni]	g17768.t1	7.75e-24	103.219
XP_026760528.1	transient receptor potential channel pyrexia isoform X2 [Galleria mellonella]	g31126.t1	1.78e-23	103.219
XP_021197962.1	neurogenic locus notch homolog protein 1 [Helicoverpa armigera]	g15050.t1	2.05e-23	102.834
AEP43793.2	black [Biston betularia]	g31342.t1	2.14e-23	100.908
XP_023934684.1	geranylgeranyl pyrophosphate synthase isoform X2 [Bicyclus anynana]	g29327.t1	4.33e-23	85.5001
XP_026494186.1	transient receptor potential channel pyrexia [Vanessa tameamea]	g35421.t1	4.41e-23	98.5969
XP_014372144.1	PREDICTED: transient receptor potential channel pyrexia [Papilio machaon]	g24674.t1	5.84e-23	98.9821
XP_021182312.1	LOW QUALITY PROTEIN: protein decapentaplegic [Helicoverpa armigera]	g18355.t1	7.08e-23	86.6557
XP_026315516.1	protein decapentaplegic [Hyposmocoma kahamanoa]	g5178.t1	8.88e-23	93.9745
XP_023940821.1	doublesex- and mab-3-related transcription factor A2 [Bicyclus anynana]	g4712.t1	2.8e-22	85.1149
AIB07898.1	Hox cluster protein pb [Pararge aegeria]	g6061.t1	4.25e-22	93.5893
AIB07884.1	Hox cluster protein pb [Cameraria ohridella]	g26746.t1	5.24e-22	92.4337
AIB07884.1	Hox cluster protein pb [Cameraria ohridella]	g15769.t1	5.24e-22	92.4337
AIB07884.1	Hox cluster protein pb [Cameraria ohridella]	g4344.t1	5.24e-22	92.4337
AIB07892.1	Hox cluster protein pb [Triodia sylvina]	g20761.t1	9.04e-22	97.8265
XP_026736064.1	homeobox protein engrailed [Trichoplusia ni]	g33035.t1	1.13e-21	88.5817
XP_026736064.1	homeobox protein engrailed [Trichoplusia ni]	g1116.t1	1.2e-21	88.9669
XP_026736064.1	homeobox protein engrailed [Trichoplusia ni]	g32568.t1	1.2e-21	88.9669
XP_026321993.1	protein spaetzle isoform X2 [Hyposmocoma kahamanoa]	g7587.t1	1.32e-21	85.1149
XP_028025674.1	LOW QUALITY PROTEIN: neurogenic locus notch homolog protein 2-like [Bombyx mandarina]	g25494.t1	1.5e-21	96.6709
XP_022116239.1	transient receptor potential channel pyrexia isoform X2 [Pieris rapae]	g33766.t1	1.55e-21	93.2041
XP_026735244.1	transient receptor potential channel pyrexia [Trichoplusia ni]	g15337.t1	2.53e-21	96.2857
BAK19077.1	apterous B alpha [Bombyx mori]	g21209.t1	3.04e-21	88.1965
OWR47439.1	putative C3 and PZP alpha-2-macroglobulin domain-containing protein 8 [Danaus plexippus plexippus]	g5155.t1	3.75e-21	83.5741
GBP04056.1	Transient receptor potential channel pyrexia [Eumeta japonica]	g23411.t1	5.34e-21	95.5153
AFK27932.1	Ecdysone receptor [Spodoptera litura]	g10789.t1	6.51e-21	86.2705
AFK27932.1	Ecdysone receptor [Spodoptera litura]	g21946.t1	2.2e-20	89.3521
GBO98634.1	Ectoderm-neural cortex protein 1 [Eumeta japonica]	g14416.t1	3.26e-20	88.1965
AAB32450.1	Distal-less Dll limb-patterning gene product [Junonia coenia=buckeye, Peptide, 197 aa]	g34259.t1	3.37e-20	79.7221
XP_026315092.1	transient receptor potential channel pyrexia [Hyposmocoma kahamanoa]	g18762.t2	3.4e-20	85.1149
AAB32450.1	Distal-less Dll limb-patterning gene product [Junonia coenia=buckeye, Peptide, 197 aa]	g34261.t1	4.58e-20	78.5666
AIB07892.1	Hox cluster protein pb [Triodia sylvina]	g6793.t1	6.02e-20	80.8777
XP_023953379.1	neurogenic locus notch homolog protein 1 isoform X1 [Bicyclus anynana]	g9155.t1	8.36e-20	75.485
XP_022125910.1	neurogenic locus Notch protein isoform X1 [Pieris rapae]	g214.t1	8.69e-20	91.6633
XP_022125910.1	neurogenic locus Notch protein isoform X1 [Pieris rapae]	g214.t2	9.9e-20	91.6633
KOB61914.1	Vermilion [Operophtera brumata]	g1803.t1	1.37e-19	78.5666
XP_026497379.1	C2 domain-containing protein 5 [Vanessa tameamea]	g5586.t1	1.81e-19	77.7962
JAA89047.1	cortex [Pararge aegeria]	g13719.t1	1.92e-19	75.8702
BAK19078.1	apterous B beta [Bombyx mori]	g24112.t1	2.58e-19	78.5666
XP_026315092.1	transient receptor potential channel pyrexia [Hyposmocoma kahamanoa]	g23548.t3	2.72e-19	81.2629
OWR44146.1	spalt protein [Danaus plexippus plexippus]	g28262.t1	4.61e-19	80.8777
OWR46938.1	WntA signaling ligand [Danaus plexippus plexippus]	g20821.t1	5.33e-19	83.5741
XP_013184439.1	PREDICTED: transient receptor potential channel pyrexia isoform X2 [Amyelois transitella]	g35789.t1	6.12e-19	78.9518
AIB07879.1	Hox cluster protein ShxA [Cameraria ohridella]	g27868.t1	6.92e-19	80.8777
AAB32450.1	Distal-less Dll limb-patterning gene product [Junonia coenia=buckeye, Peptide, 197 aa]	g5932.t1	7.54e-19	75.485
XP_011564306.1	PREDICTED: ecdysone receptor [Plutella xylostella]	g11600.t1	7.79e-19	85.8853
XP_026764390.1	neurogenic locus Notch protein isoform X3 [Galleria mellonella]	g10434.t1	9.4e-19	82.8037
XP_011564306.1	PREDICTED: ecdysone receptor [Plutella xylostella]	g2441.t1	9.42e-19	85.8853
XP_026735244.1	transient receptor potential channel pyrexia [Trichoplusia ni]	g4870.t1	9.45e-19	86.6557
XP_014359206.1	PREDICTED: LOW QUALITY PROTEIN: neurogenic locus Notch protein-like [Papilio machaon]	g22967.t1	9.65e-19	88.5817
OWR44146.1	spalt protein [Danaus plexippus plexippus]	g12170.t4	1.11e-18	87.4261
XP_011569112.1	PREDICTED: neurogenic locus Notch protein [Plutella xylostella]	g11033.t1	1.21e-18	83.5741
AIB07898.1	Hox cluster protein pb [Pararge aegeria]	g11462.t1	1.25e-18	82.8037
XP_023945739.1	transient receptor potential channel pyrexia [Bicyclus anynana]	g19901.t1	1.99e-18	84.7297
AAB32450.1	Distal-less Dll limb-patterning gene product [Junonia coenia=buckeye, Peptide, 197 aa]	g35875.t1	2.68e-18	77.0258
XP_026760528.1	transient receptor potential channel pyrexia isoform X2 [Galleria mellonella]	g35915.t1	2.95e-18	82.4185
OWR44146.1	spalt protein [Danaus plexippus plexippus]	g1848.t1	3.49e-18	82.8037
OWR44146.1	spalt protein [Danaus plexippus plexippus]	g28746.t1	3.49e-18	82.8037
XP_013183510.1	PREDICTED: homeotic protein distal-less [Amyelois transitella]	g16712.t1	3.72e-18	73.559
KPJ11429.1	Doublesex- and mab-3-related transcription factor A2 [Papilio machaon]	g36068.t1	3.79e-18	77.7962
ARD05165.1	ecdysone receptor isoform B1 [Antheraea pernyi]	g9124.t1	4.74e-18	80.1073
OWR47439.1	putative C3 and PZP alpha-2-macroglobulin domain-containing protein 8 [Danaus plexippus plexippus]	g13246.t1	4.75e-18	75.485
GBO98634.1	Ectoderm-neural cortex protein 1 [Eumeta japonica]	g7812.t1	5.25e-18	81.6481
GBO98634.1	Ectoderm-neural cortex protein 1 [Eumeta japonica]	g1332.t1	5.25e-18	81.6481
OWR46390.1	Phosphatidylinositol-4-phosphate 3-kinase C2 domain-containing beta polypeptide [Danaus plexippus plexippus]	g17824.t1	5.48e-18	84.3445
AAB32450.1	Distal-less Dll limb-patterning gene product [Junonia coenia=buckeye, Peptide, 197 aa]	g13022.t1	1.04e-17	73.9442
AIB07900.1	Hox cluster protein ShxA [Pararge aegeria]	g17297.t1	1.26e-17	78.5666
XP_013184429.1	PREDICTED: transient receptor potential channel pyrexia isoform X1 [Amyelois transitella]	g34342.t1	1.34e-17	81.2629
XP_011550020.1	PREDICTED: phosphatidylinositol 4-phosphate 3-kinase C2 domain-containing subunit alpha-like [Plutella xylostella]	g17817.t1	1.99e-17	80.8777
OWR50480.1	apterous B alpha [Danaus plexippus plexippus]	g21210.t1	2.19e-17	71.2478
XP_026736064.1	homeobox protein engrailed [Trichoplusia ni]	g20974.t1	2.42e-17	80.1073
OWR44146.1	spalt protein [Danaus plexippus plexippus]	g34348.t2	2.69e-17	83.9593
XP_022118145.1	protein spaetzle isoform X2 [Pieris rapae]	g29827.t1	2.97e-17	73.1738
OWR44146.1	spalt protein [Danaus plexippus plexippus]	g34348.t1	3.16e-17	83.5741
OWR44146.1	spalt protein [Danaus plexippus plexippus]	g13434.t1	3.23e-17	78.1814
AIB07900.1	Hox cluster protein ShxA [Pararge aegeria]	g28343.t1	3.79e-17	72.4034
ADK66917.1	ecdysone receptor A [Spodoptera exigua]	g25788.t1	3.9e-17	73.559
OWR44146.1	spalt protein [Danaus plexippus plexippus]	g20094.t1	5.02e-17	77.411
AIB07883.1	Hox cluster protein Dfd [Cameraria ohridella]	g22898.t1	5.19e-17	77.411
OWR46938.1	WntA signaling ligand [Danaus plexippus plexippus]	g9946.t1	5.54e-17	71.2478
OWR46938.1	WntA signaling ligand [Danaus plexippus plexippus]	g20207.t1	6.06e-17	72.4034
OWR46938.1	WntA signaling ligand [Danaus plexippus plexippus]	g3057.t1	6.28e-17	73.1738
AIB07900.1	Hox cluster protein ShxA [Pararge aegeria]	g31590.t1	8.69e-17	77.0258
XP_026494186.1	transient receptor potential channel pyrexia [Vanessa tameamea]	g24280.t1	8.77e-17	81.6481
XP_026324001.1	neurogenic locus Notch protein isoform X5 [Hyposmocoma kahamanoa]	g11413.t1	9.03e-17	80.8777
KPJ11429.1	Doublesex- and mab-3-related transcription factor A2 [Papilio machaon]	g36067.t1	9.23e-17	72.7886
XP_022116239.1	transient receptor potential channel pyrexia isoform X2 [Pieris rapae]	g25200.t1	1.01e-16	80.1073
OWR44146.1	spalt protein [Danaus plexippus plexippus]	g12170.t3	1.06e-16	80.4925
XP_013197540.1	PREDICTED: neurogenic locus notch homolog protein 3-like [Amyelois transitella]	g21593.t1	1.13e-16	75.485
KPJ08397.1	Geranylgeranyl pyrophosphate synthase [Papilio machaon]	g6188.t1	1.13e-16	68.9366
XP_026760528.1	transient receptor potential channel pyrexia isoform X2 [Galleria mellonella]	g10378.t1	1.76e-16	81.2629
OWR50480.1	apterous B alpha [Danaus plexippus plexippus]	g12743.t1	1.92e-16	77.0258
XP_026484512.1	protein decapentaplegic [Vanessa tameamea]	g13078.t1	1.99e-16	74.7146
AAB32450.1	Distal-less Dll limb-patterning gene product [Junonia coenia=buckeye, Peptide, 197 aa]	g16589.t1	2.23e-16	73.559
XP_022837346.1	multiple C2 and transmembrane domain-containing protein isoform X2 [Spodoptera litura]	g35832.t3	2.31e-16	78.1814
XP_022837345.1	multiple C2 and transmembrane domain-containing protein isoform X1 [Spodoptera litura]	g35832.t2	2.51e-16	77.7962
XP_021197962.1	neurogenic locus notch homolog protein 1 [Helicoverpa armigera]	g14096.t1	2.52e-16	71.633
AIB07900.1	Hox cluster protein ShxA [Pararge aegeria]	g23065.t1	2.63e-16	70.0922
XP_028158264.1	neurogenic locus Notch protein isoform X7 [Ostrinia furnacalis]	g27959.t1	2.64e-16	82.4185
XP_022837345.1	multiple C2 and transmembrane domain-containing protein isoform X1 [Spodoptera litura]	g35832.t1	2.65e-16	77.7962
XP_028158264.1	neurogenic locus Notch protein isoform X7 [Ostrinia furnacalis]	g1883.t1	2.68e-16	78.5666
XP_026494186.1	transient receptor potential channel pyrexia [Vanessa tameamea]	g24129.t1	2.7e-16	78.9518
XP_022817516.1	transient receptor potential channel pyrexia isoform X1 [Spodoptera litura]	g11699.t1	2.72e-16	74.3294
OWR44146.1	spalt protein [Danaus plexippus plexippus]	g882.t1	2.75e-16	78.9518
GBO98634.1	Ectoderm-neural cortex protein 1 [Eumeta japonica]	g9442.t1	2.78e-16	76.6406
OWR41021.1	EN protein binding/engrailed nuclear homeoprotein-regulated [Danaus plexippus plexippus]	g25273.t1	3.1e-16	68.5514
OWR44146.1	spalt protein [Danaus plexippus plexippus]	g19563.t1	3.55e-16	78.1814
KPJ02943.1	Protein spaetzle [Papilio xuthus]	g6069.t1	4.11e-16	70.0922
OWR44146.1	spalt protein [Danaus plexippus plexippus]	g883.t1	4.72e-16	76.6406
XP_011554413.1	PREDICTED: transient receptor potential channel pyrexia [Plutella xylostella]	g2244.t1	4.88e-16	77.7962
KPJ03457.1	Transient receptor potential channel pyrexia [Papilio xuthus]	g2981.t1	5.4e-16	73.9442
KPJ03457.1	Transient receptor potential channel pyrexia [Papilio xuthus]	g7910.t1	5.4e-16	73.9442
OWR44146.1	spalt protein [Danaus plexippus plexippus]	g29032.t1	6.27e-16	76.6406
XP_022837347.1	multiple C2 and transmembrane domain-containing protein isoform X3 [Spodoptera litura]	g10400.t1	7.12e-16	78.1814
OWR44146.1	spalt protein [Danaus plexippus plexippus]	g18668.t1	7.21e-16	77.0258
OWR44146.1	spalt protein [Danaus plexippus plexippus]	g8110.t1	7.48e-16	77.411
XP_022817517.1	transient receptor potential channel pyrexia isoform X2 [Spodoptera litura]	g7837.t1	7.72e-16	66.6254
XP_028158264.1	neurogenic locus Notch protein isoform X7 [Ostrinia furnacalis]	g17718.t1	7.99e-16	79.337
OWR44146.1	spalt protein [Danaus plexippus plexippus]	g29032.t2	9.57e-16	76.6406
AIB07883.1	Hox cluster protein Dfd [Cameraria ohridella]	g3821.t1	9.7e-16	68.9366
AIB07883.1	Hox cluster protein Dfd [Cameraria ohridella]	g34243.t1	9.7e-16	68.9366
XP_013165317.1	PREDICTED: neurogenic locus notch homolog protein 3-like [Papilio xuthus]	g1390.t1	1.05e-15	78.9518
XP_013184429.1	PREDICTED: transient receptor potential channel pyrexia isoform X1 [Amyelois transitella]	g22415.t1	1.08e-15	67.3958
AIB07883.1	Hox cluster protein Dfd [Cameraria ohridella]	g17128.t1	1.15e-15	68.9366
OWR44146.1	spalt protein [Danaus plexippus plexippus]	g21506.t2	1.16e-15	74.3294
XP_022819216.1	neurogenic locus Notch protein isoform X5 [Spodoptera litura]	g14946.t1	1.23e-15	79.7221
GBP73349.1	Neurogenic locus Notch protein [Eumeta japonica]	g26820.t1	1.28e-15	77.7962
OWR44146.1	spalt protein [Danaus plexippus plexippus]	g18292.t1	1.43e-15	76.6406
AIB07900.1	Hox cluster protein ShxA [Pararge aegeria]	g31585.t1	1.52e-15	71.633
XP_022819216.1	neurogenic locus Notch protein isoform X5 [Spodoptera litura]	g29741.t1	1.57e-15	79.337
OWR44146.1	spalt protein [Danaus plexippus plexippus]	g23645.t1	1.63e-15	72.7886
GBO98634.1	Ectoderm-neural cortex protein 1 [Eumeta japonica]	g14422.t1	1.65e-15	73.9442
OWR44146.1	spalt protein [Danaus plexippus plexippus]	g7940.t1	1.68e-15	75.0998
XP_022819216.1	neurogenic locus Notch protein isoform X5 [Spodoptera litura]	g29741.t2	1.78e-15	79.337
XP_011554413.1	PREDICTED: transient receptor potential channel pyrexia [Plutella xylostella]	g4343.t1	1.97e-15	77.411
XP_028025674.1	LOW QUALITY PROTEIN: neurogenic locus notch homolog protein 2-like [Bombyx mandarina]	g26514.t1	2.13e-15	78.1814
OWR44146.1	spalt protein [Danaus plexippus plexippus]	g21506.t3	2.6e-15	74.3294
OWR44146.1	spalt protein [Danaus plexippus plexippus]	g13987.t1	2.85e-15	73.1738
OWR44146.1	spalt protein [Danaus plexippus plexippus]	g7940.t2	3.13e-15	72.7886
OWR44146.1	spalt protein [Danaus plexippus plexippus]	g7939.t1	3.18e-15	72.7886
XP_022819216.1	neurogenic locus Notch protein isoform X5 [Spodoptera litura]	g14939.t1	3.29e-15	77.411
OWR44146.1	spalt protein [Danaus plexippus plexippus]	g2661.t1	3.32e-15	75.8702
OWR50480.1	apterous B alpha [Danaus plexippus plexippus]	g31568.t1	3.77e-15	73.9442
OWR44146.1	spalt protein [Danaus plexippus plexippus]	g32900.t1	4.27e-15	75.0998
XP_022817517.1	transient receptor potential channel pyrexia isoform X2 [Spodoptera litura]	g34702.t1	4.75e-15	74.7146
AAB32450.1	Distal-less Dll limb-patterning gene product [Junonia coenia=buckeye, Peptide, 197 aa]	g12694.t1	5.12e-15	69.3218
OWR44146.1	spalt protein [Danaus plexippus plexippus]	g25220.t1	5.24e-15	75.0998
OWR44146.1	spalt protein [Danaus plexippus plexippus]	g26238.t2	5.3e-15	72.7886
OWR44146.1	spalt protein [Danaus plexippus plexippus]	g12170.t2	6.73e-15	75.0998
OWR44146.1	spalt protein [Danaus plexippus plexippus]	g12170.t1	7.2e-15	74.3294
GBO98634.1	Ectoderm-neural cortex protein 1 [Eumeta japonica]	g35357.t1	7.34e-15	64.3142
AAB32450.1	Distal-less Dll limb-patterning gene product [Junonia coenia=buckeye, Peptide, 197 aa]	g17735.t1	7.98e-15	67.0106
OWR44146.1	spalt protein [Danaus plexippus plexippus]	g13433.t1	9.53e-15	73.1738
GBP96779.1	Transient receptor potential channel pyrexia [Eumeta japonica]	g34156.t1	1.01e-14	72.0182
OWR44146.1	spalt protein [Danaus plexippus plexippus]	g21506.t1	1.04e-14	69.707
OWR44146.1	spalt protein [Danaus plexippus plexippus]	g12327.t1	1.29e-14	66.6254
GBP73349.1	Neurogenic locus Notch protein [Eumeta japonica]	g3086.t1	1.37e-14	68.5514
OWR44146.1	spalt protein [Danaus plexippus plexippus]	g6161.t1	1.41e-14	73.559
AIB07901.1	Hox cluster protein ShxC [Pararge aegeria]	g24075.t1	1.46e-14	69.3218
XP_026735244.1	transient receptor potential channel pyrexia [Trichoplusia ni]	g34537.t1	1.49e-14	71.633
OWR44146.1	spalt protein [Danaus plexippus plexippus]	g22526.t1	1.6e-14	67.0106
OWR44146.1	spalt protein [Danaus plexippus plexippus]	g21008.t1	1.6e-14	67.0106
OWR44146.1	spalt protein [Danaus plexippus plexippus]	g21344.t1	1.63e-14	72.4034
AAL69325.1	distal-less [Bicyclus anynana]	g23528.t1	1.64e-14	70.4774
AAB32450.1	Distal-less Dll limb-patterning gene product [Junonia coenia=buckeye, Peptide, 197 aa]	g26791.t1	1.7e-14	67.3958
OWR44146.1	spalt protein [Danaus plexippus plexippus]	g32650.t1	1.8e-14	70.4774
OWR44146.1	spalt protein [Danaus plexippus plexippus]	g32630.t1	1.98e-14	70.8626
AAB32450.1	Distal-less Dll limb-patterning gene product [Junonia coenia=buckeye, Peptide, 197 aa]	g14618.t1	2.03e-14	67.3958
KOB66732.1	Hox cluster protein ShxA [Operophtera brumata]	g17098.t1	2.37e-14	66.2402
OWR46390.1	Phosphatidylinositol-4-phosphate 3-kinase C2 domain-containing beta polypeptide [Danaus plexippus plexippus]	g27633.t1	2.57e-14	66.2402
XP_028025674.1	LOW QUALITY PROTEIN: neurogenic locus notch homolog protein 2-like [Bombyx mandarina]	g23789.t1	2.63e-14	74.3294
OWR44146.1	spalt protein [Danaus plexippus plexippus]	g889.t1	3.18e-14	69.3218
XP_021193109.1	mothers against decapentaplegic homolog 6 [Helicoverpa armigera]	g14203.t1	3.5e-14	63.1586
OWR44146.1	spalt protein [Danaus plexippus plexippus]	g32650.t2	4e-14	70.0922
XP_028160038.1	transient receptor potential channel pyrexia isoform X2 [Ostrinia furnacalis]	g4784.t2	4.12e-14	73.1738
OWR44146.1	spalt protein [Danaus plexippus plexippus]	g28405.t1	4.93e-14	70.8626
GBP82632.1	Protein decapentaplegic [Eumeta japonica]	g29093.t1	5.17e-14	66.2402
OWR44146.1	spalt protein [Danaus plexippus plexippus]	g17515.t1	5.85e-14	70.0922
XP_028160038.1	transient receptor potential channel pyrexia isoform X2 [Ostrinia furnacalis]	g4784.t1	6.4e-14	72.7886
XP_026735244.1	transient receptor potential channel pyrexia [Trichoplusia ni]	g13167.t1	6.93e-14	70.0922
XP_022837346.1	multiple C2 and transmembrane domain-containing protein isoform X2 [Spodoptera litura]	g18294.t1	7.36e-14	68.5514
XP_013184439.1	PREDICTED: transient receptor potential channel pyrexia isoform X2 [Amyelois transitella]	g9336.t1	7.52e-14	65.4698
OWR44146.1	spalt protein [Danaus plexippus plexippus]	g30850.t1	7.85e-14	69.3218
XP_026321771.1	calcium-activated potassium channel slowpoke isoform X8 [Hyposmocoma kahamanoa]	g11648.t2	8.34e-14	72.0182
OWR44146.1	spalt protein [Danaus plexippus plexippus]	g8312.t1	8.88e-14	72.0182
KPJ07178.1	Zinc finger CCCH domain-containing protein 3 [Papilio machaon]	g8945.t1	9.08e-14	67.3958
XP_026321771.1	calcium-activated potassium channel slowpoke isoform X8 [Hyposmocoma kahamanoa]	g11648.t1	9.18e-14	71.633
XP_014372144.1	PREDICTED: transient receptor potential channel pyrexia [Papilio machaon]	g11695.t1	9.95e-14	69.707
OWR44146.1	spalt protein [Danaus plexippus plexippus]	g18490.t1	1e-13	70.8626
KOB66732.1	Hox cluster protein ShxA [Operophtera brumata]	g29454.t1	1.01e-13	62.3882
OWR44146.1	spalt protein [Danaus plexippus plexippus]	g33297.t1	1.02e-13	65.855
OWR44146.1	spalt protein [Danaus plexippus plexippus]	g3892.t1	1.05e-13	68.9366
OWR44146.1	spalt protein [Danaus plexippus plexippus]	g18290.t1	1.17e-13	68.5514
XP_026760526.1	transient receptor potential channel pyrexia isoform X1 [Galleria mellonella]	g23548.t2	1.2e-13	69.3218
XP_026735244.1	transient receptor potential channel pyrexia [Trichoplusia ni]	g16728.t1	1.21e-13	70.4774
BAK19081.1	apterous A splicing isoform type D [Bombyx mori]	g4646.t1	1.24e-13	68.1662
XP_028157770.1	ligand of Numb protein X 2-like [Ostrinia furnacalis]	g17494.t1	1.35e-13	62.7734
OWR44146.1	spalt protein [Danaus plexippus plexippus]	g13108.t1	1.46e-13	67.781
XP_028157770.1	ligand of Numb protein X 2-like [Ostrinia furnacalis]	g17494.t2	1.47e-13	63.1586
OWR44146.1	spalt protein [Danaus plexippus plexippus]	g14273.t2	1.49e-13	70.0922
OWR44146.1	spalt protein [Danaus plexippus plexippus]	g14273.t1	1.51e-13	70.0922
DAA64849.1	TPA_inf: Hox cluster protein Shx11 [Bombyx mori]	g29365.t1	1.77e-13	64.6994
XP_013170945.1	PREDICTED: transient receptor potential channel pyrexia isoform X2 [Papilio xuthus]	g21433.t1	1.88e-13	62.003
OWR44146.1	spalt protein [Danaus plexippus plexippus]	g1647.t1	1.89e-13	70.8626
OWR44146.1	spalt protein [Danaus plexippus plexippus]	g1647.t2	2.2e-13	70.4774
OWR44146.1	spalt protein [Danaus plexippus plexippus]	g12919.t1	2.38e-13	65.0846
OWR44146.1	spalt protein [Danaus plexippus plexippus]	g32766.t1	2.49e-13	68.1662
XP_026315303.1	protein numb [Hyposmocoma kahamanoa]	g16458.t1	2.57e-13	66.6254
OWR46390.1	Phosphatidylinositol-4-phosphate 3-kinase C2 domain-containing beta polypeptide [Danaus plexippus plexippus]	g21368.t1	2.75e-13	59.3066
KPJ09095.1	Protein apterous [Papilio machaon]	g26799.t1	3.33e-13	62.003
BAK19077.1	apterous B alpha [Bombyx mori]	g3863.t1	3.76e-13	58.9214
XP_011569112.1	PREDICTED: neurogenic locus Notch protein [Plutella xylostella]	g11030.t1	3.91e-13	68.5514
OWR44146.1	spalt protein [Danaus plexippus plexippus]	g11309.t1	4.18e-13	69.3218
XP_022116237.1	transient receptor potential channel pyrexia isoform X1 [Pieris rapae]	g17767.t1	4.25e-13	62.7734
BAK19077.1	apterous B alpha [Bombyx mori]	g1987.t1	4.28e-13	61.2326
OWR44146.1	spalt protein [Danaus plexippus plexippus]	g31490.t1	4.43e-13	67.781
GBP04056.1	Transient receptor potential channel pyrexia [Eumeta japonica]	g17767.t2	4.58e-13	62.7734
OWR44146.1	spalt protein [Danaus plexippus plexippus]	g10463.t1	4.62e-13	68.9366
XP_028025674.1	LOW QUALITY PROTEIN: neurogenic locus notch homolog protein 2-like [Bombyx mandarina]	g33602.t1	4.82e-13	67.3958
OWR44146.1	spalt protein [Danaus plexippus plexippus]	g26102.t1	4.87e-13	69.3218
OWR44146.1	spalt protein [Danaus plexippus plexippus]	g31606.t1	5.2e-13	69.3218
XP_026736064.1	homeobox protein engrailed [Trichoplusia ni]	g20082.t1	5.32e-13	61.6178
OWR44146.1	spalt protein [Danaus plexippus plexippus]	g6154.t1	5.46e-13	60.8474
KOB67879.1	Transient receptor potential channel pyrexia [Operophtera brumata]	g10882.t1	5.5e-13	67.781
OWR44146.1	spalt protein [Danaus plexippus plexippus]	g1836.t1	5.75e-13	67.781
OWR44146.1	spalt protein [Danaus plexippus plexippus]	g6642.t1	6.04e-13	69.707
XP_026736064.1	homeobox protein engrailed [Trichoplusia ni]	g26028.t1	7.22e-13	59.6918
XP_011562003.1	PREDICTED: doublesex- and mab-3-related transcription factor 2-like [Plutella xylostella]	g7919.t1	7.51e-13	57.7658
XP_011562003.1	PREDICTED: doublesex- and mab-3-related transcription factor 2-like [Plutella xylostella]	g7920.t1	7.51e-13	57.7658
OWR44146.1	spalt protein [Danaus plexippus plexippus]	g12328.t1	7.7e-13	64.3142
XP_026494186.1	transient receptor potential channel pyrexia [Vanessa tameamea]	g19952.t1	7.94e-13	67.0106
OWR46390.1	Phosphatidylinositol-4-phosphate 3-kinase C2 domain-containing beta polypeptide [Danaus plexippus plexippus]	g7229.t1	8.59e-13	67.0106
XP_026736064.1	homeobox protein engrailed [Trichoplusia ni]	g20383.t1	8.87e-13	64.6994
XP_026736064.1	homeobox protein engrailed [Trichoplusia ni]	g24209.t1	9.06e-13	62.3882
AAB32450.1	Distal-less Dll limb-patterning gene product [Junonia coenia=buckeye, Peptide, 197 aa]	g20874.t1	9.27e-13	63.5438
OWR44146.1	spalt protein [Danaus plexippus plexippus]	g15356.t1	9.8e-13	69.707
XP_022116237.1	transient receptor potential channel pyrexia isoform X1 [Pieris rapae]	g21917.t1	9.9e-13	66.6254
OWR44146.1	spalt protein [Danaus plexippus plexippus]	g33163.t1	1.01e-12	68.5514
OWR44146.1	spalt protein [Danaus plexippus plexippus]	g32901.t1	1.19e-12	64.6994
OWR46390.1	Phosphatidylinositol-4-phosphate 3-kinase C2 domain-containing beta polypeptide [Danaus plexippus plexippus]	g10400.t2	1.24e-12	66.6254
XP_028025674.1	LOW QUALITY PROTEIN: neurogenic locus notch homolog protein 2-like [Bombyx mandarina]	g22673.t1	1.26e-12	66.2402
GBP73349.1	Neurogenic locus Notch protein [Eumeta japonica]	g5343.t1	1.27e-12	63.5438
OWR44146.1	spalt protein [Danaus plexippus plexippus]	g25539.t1	1.3e-12	65.4698
XP_028036666.1	transient receptor potential channel pyrexia [Bombyx mandarina]	g19163.t1	1.41e-12	65.855
OWR44146.1	spalt protein [Danaus plexippus plexippus]	g20650.t1	1.52e-12	65.0846
GBP04056.1	Transient receptor potential channel pyrexia [Eumeta japonica]	g34343.t2	1.52e-12	66.2402
GBP04056.1	Transient receptor potential channel pyrexia [Eumeta japonica]	g34343.t1	1.54e-12	66.2402
OWR44146.1	spalt protein [Danaus plexippus plexippus]	g26238.t1	1.64e-12	63.5438
OWR44146.1	spalt protein [Danaus plexippus plexippus]	g20602.t1	1.66e-12	64.3142
OWR44146.1	spalt protein [Danaus plexippus plexippus]	g18670.t1	1.73e-12	66.2402
OWR44146.1	spalt protein [Danaus plexippus plexippus]	g26786.t1	1.77e-12	65.4698
XP_011550020.1	PREDICTED: phosphatidylinositol 4-phosphate 3-kinase C2 domain-containing subunit alpha-like [Plutella xylostella]	g14319.t1	1.87e-12	64.6994
XP_014359206.1	PREDICTED: LOW QUALITY PROTEIN: neurogenic locus Notch protein-like [Papilio machaon]	g26504.t1	1.87e-12	68.1662
OWR44146.1	spalt protein [Danaus plexippus plexippus]	g19061.t1	1.93e-12	66.2402
OWR44146.1	spalt protein [Danaus plexippus plexippus]	g3344.t1	1.98e-12	67.0106
OWR44146.1	spalt protein [Danaus plexippus plexippus]	g12090.t1	2.1e-12	62.7734
OWR44146.1	spalt protein [Danaus plexippus plexippus]	g34908.t1	2.11e-12	67.0106
XP_013184429.1	PREDICTED: transient receptor potential channel pyrexia isoform X1 [Amyelois transitella]	g33042.t1	2.13e-12	66.6254
XP_028158264.1	neurogenic locus Notch protein isoform X7 [Ostrinia furnacalis]	g6230.t1	2.6e-12	61.6178
OWR44146.1	spalt protein [Danaus plexippus plexippus]	g35982.t1	2.65e-12	65.855
OWR44146.1	spalt protein [Danaus plexippus plexippus]	g31627.t1	2.73e-12	60.8474
OWR44146.1	spalt protein [Danaus plexippus plexippus]	g6983.t1	2.77e-12	65.0846
XP_011565170.1	PREDICTED: phosphatidylinositol 4-phosphate 3-kinase C2 domain-containing subunit alpha-like [Plutella xylostella]	g14503.t1	2.82e-12	67.781
OWR46390.1	Phosphatidylinositol-4-phosphate 3-kinase C2 domain-containing beta polypeptide [Danaus plexippus plexippus]	g12588.t1	2.88e-12	68.5514
XP_013184429.1	PREDICTED: transient receptor potential channel pyrexia isoform X1 [Amyelois transitella]	g14298.t1	3.04e-12	65.855
XP_026760528.1	transient receptor potential channel pyrexia isoform X2 [Galleria mellonella]	g28440.t1	3.15e-12	65.0846
XP_022819216.1	neurogenic locus Notch protein isoform X5 [Spodoptera litura]	g11031.t1	3.24e-12	63.1586
OWR44146.1	spalt protein [Danaus plexippus plexippus]	g31438.t1	3.34e-12	65.4698
XP_026315303.1	protein numb [Hyposmocoma kahamanoa]	g23409.t1	3.61e-12	65.0846
BAK19080.1	apterous A splicing isoform type C [Bombyx mori]	g3669.t3	3.63e-12	63.929
XP_026736064.1	homeobox protein engrailed [Trichoplusia ni]	g21252.t1	3.66e-12	63.1586
BAK19078.1	apterous B beta [Bombyx mori]	g24664.t1	3.69e-12	63.1586
XP_026736064.1	homeobox protein engrailed [Trichoplusia ni]	g5290.t1	3.73e-12	58.9214
OWR44146.1	spalt protein [Danaus plexippus plexippus]	g5786.t1	3.75e-12	65.0846
OWR44146.1	spalt protein [Danaus plexippus plexippus]	g23775.t1	4.54e-12	63.5438
OWR44146.1	spalt protein [Danaus plexippus plexippus]	g17775.t1	4.65e-12	63.929
OWR44146.1	spalt protein [Danaus plexippus plexippus]	g17775.t2	4.65e-12	63.929
OWR44146.1	spalt protein [Danaus plexippus plexippus]	g7264.t1	4.66e-12	64.6994
XP_022116237.1	transient receptor potential channel pyrexia isoform X1 [Pieris rapae]	g18540.t1	4.85e-12	65.855
OWR44146.1	spalt protein [Danaus plexippus plexippus]	g8385.t1	4.87e-12	65.855
BAK19080.1	apterous A splicing isoform type C [Bombyx mori]	g29418.t2	5.1e-12	63.5438
BAK19080.1	apterous A splicing isoform type C [Bombyx mori]	g32833.t2	5.14e-12	63.5438
GBP04056.1	Transient receptor potential channel pyrexia [Eumeta japonica]	g7189.t1	6.82e-12	60.8474
GBP04056.1	Transient receptor potential channel pyrexia [Eumeta japonica]	g7211.t1	6.82e-12	60.8474
OWR44146.1	spalt protein [Danaus plexippus plexippus]	g19753.t1	7.02e-12	65.0846
OWR44146.1	spalt protein [Danaus plexippus plexippus]	g35091.t1	7.1e-12	57.7658
XP_004921982.1	protein cortex isoform X2 [Bombyx mori]	g9281.t1	7.48e-12	63.5438
OWR44146.1	spalt protein [Danaus plexippus plexippus]	g20647.t1	7.51e-12	60.4622
GBP96779.1	Transient receptor potential channel pyrexia [Eumeta japonica]	g35415.t1	7.75e-12	61.2326
OWR44146.1	spalt protein [Danaus plexippus plexippus]	g13720.t1	8.05e-12	65.0846
XP_028035645.1	transient receptor potential channel pyrexia [Bombyx mandarina]	g28047.t1	8.41e-12	62.7734
GBP04056.1	Transient receptor potential channel pyrexia [Eumeta japonica]	g10727.t1	8.75e-12	62.3882
AAB32450.1	Distal-less Dll limb-patterning gene product [Junonia coenia=buckeye, Peptide, 197 aa]	g12140.t1	8.97e-12	60.077
KPJ09095.1	Protein apterous [Papilio machaon]	g10111.t1	9.28e-12	58.5362
OWR44146.1	spalt protein [Danaus plexippus plexippus]	g35087.t1	9.93e-12	59.6918
OWR44146.1	spalt protein [Danaus plexippus plexippus]	g16788.t1	1.03e-11	61.6178
XP_026760528.1	transient receptor potential channel pyrexia isoform X2 [Galleria mellonella]	g29768.t1	1.04e-11	62.7734
XP_026736064.1	homeobox protein engrailed [Trichoplusia ni]	g22346.t1	1.05e-11	63.5438
XP_028025674.1	LOW QUALITY PROTEIN: neurogenic locus notch homolog protein 2-like [Bombyx mandarina]	g21173.t1	1.19e-11	60.4622
GBP96778.1	Transient receptor potential channel pyrexia [Eumeta japonica]	g8773.t1	1.21e-11	63.929
XP_022837346.1	multiple C2 and transmembrane domain-containing protein isoform X2 [Spodoptera litura]	g16823.t1	1.25e-11	63.1586
OWR44146.1	spalt protein [Danaus plexippus plexippus]	g18529.t1	1.56e-11	59.3066
OWR44146.1	spalt protein [Danaus plexippus plexippus]	g20641.t1	1.61e-11	62.7734
OWR44146.1	spalt protein [Danaus plexippus plexippus]	g11206.t1	1.84e-11	58.9214
OWR44146.1	spalt protein [Danaus plexippus plexippus]	g29371.t1	1.93e-11	62.003
GBP96779.1	Transient receptor potential channel pyrexia [Eumeta japonica]	g25959.t1	1.96e-11	62.7734
OWR44146.1	spalt protein [Danaus plexippus plexippus]	g18666.t1	1.98e-11	64.3142
OWR44146.1	spalt protein [Danaus plexippus plexippus]	g17331.t1	2.02e-11	63.1586
OWR44146.1	spalt protein [Danaus plexippus plexippus]	g12804.t1	2.04e-11	61.6178
GBO98634.1	Ectoderm-neural cortex protein 1 [Eumeta japonica]	g10498.t1	2.1e-11	61.6178
OWR44146.1	spalt protein [Danaus plexippus plexippus]	g3540.t1	2.36e-11	62.3882
OWR44146.1	spalt protein [Danaus plexippus plexippus]	g34382.t1	2.37e-11	61.2326
GBP96779.1	Transient receptor potential channel pyrexia [Eumeta japonica]	g23705.t1	2.37e-11	62.3882
OWR44146.1	spalt protein [Danaus plexippus plexippus]	g24181.t2	2.42e-11	58.151
OWR44146.1	spalt protein [Danaus plexippus plexippus]	g9287.t1	2.5e-11	61.6178
OWR46390.1	Phosphatidylinositol-4-phosphate 3-kinase C2 domain-containing beta polypeptide [Danaus plexippus plexippus]	g28610.t1	2.7e-11	58.9214
OWR44146.1	spalt protein [Danaus plexippus plexippus]	g7797.t1	2.77e-11	61.6178
OWR44146.1	spalt protein [Danaus plexippus plexippus]	g6992.t1	2.77e-11	61.6178
OWR44146.1	spalt protein [Danaus plexippus plexippus]	g23542.t1	2.95e-11	60.8474
OWR44146.1	spalt protein [Danaus plexippus plexippus]	g6643.t1	3.1e-11	61.6178
OWR44146.1	spalt protein [Danaus plexippus plexippus]	g19794.t1	3.14e-11	56.225
GBO98634.1	Ectoderm-neural cortex protein 1 [Eumeta japonica]	g1074.t1	3.21e-11	59.6918
AFK27932.1	Ecdysone receptor [Spodoptera litura]	g21631.t1	3.77e-11	57.7658
OWR44146.1	spalt protein [Danaus plexippus plexippus]	g21243.t1	3.92e-11	63.5438
XP_022837346.1	multiple C2 and transmembrane domain-containing protein isoform X2 [Spodoptera litura]	g873.t1	4.01e-11	62.003
OWR44146.1	spalt protein [Danaus plexippus plexippus]	g667.t1	4.05e-11	62.7734
GBO98634.1	Ectoderm-neural cortex protein 1 [Eumeta japonica]	g1194.t1	4.19e-11	60.077
OWR44146.1	spalt protein [Danaus plexippus plexippus]	g20862.t1	4.22e-11	62.3882
OWR44146.1	spalt protein [Danaus plexippus plexippus]	g20389.t1	4.67e-11	62.003
OWR44146.1	spalt protein [Danaus plexippus plexippus]	g23050.t1	4.77e-11	60.8474
OWR44146.1	spalt protein [Danaus plexippus plexippus]	g18369.t1	4.95e-11	62.003
GBO98634.1	Ectoderm-neural cortex protein 1 [Eumeta japonica]	g9897.t1	4.96e-11	60.4622
OWR44146.1	spalt protein [Danaus plexippus plexippus]	g33199.t1	5.04e-11	60.8474
OWR44146.1	spalt protein [Danaus plexippus plexippus]	g6924.t1	5.24e-11	61.2326
OWR44146.1	spalt protein [Danaus plexippus plexippus]	g12486.t1	5.35e-11	62.003
XP_026321771.1	calcium-activated potassium channel slowpoke isoform X8 [Hyposmocoma kahamanoa]	g12530.t2	5.52e-11	62.003
BAK19077.1	apterous B alpha [Bombyx mori]	g30331.t1	5.83e-11	60.8474
OWR44146.1	spalt protein [Danaus plexippus plexippus]	g888.t1	5.89e-11	60.8474
XP_026321771.1	calcium-activated potassium channel slowpoke isoform X8 [Hyposmocoma kahamanoa]	g12530.t1	7.15e-11	61.6178
GBP96779.1	Transient receptor potential channel pyrexia [Eumeta japonica]	g28216.t3	7.21e-11	61.2326
GBP96779.1	Transient receptor potential channel pyrexia [Eumeta japonica]	g28216.t2	7.23e-11	60.8474
OWR44146.1	spalt protein [Danaus plexippus plexippus]	g29197.t1	7.44e-11	61.2326
OWR44146.1	spalt protein [Danaus plexippus plexippus]	g15221.t1	7.5e-11	60.8474
OWR44146.1	spalt protein [Danaus plexippus plexippus]	g10527.t1	7.76e-11	56.9954
OWR44146.1	spalt protein [Danaus plexippus plexippus]	g24180.t1	7.84e-11	61.2326
OWR44146.1	spalt protein [Danaus plexippus plexippus]	g16246.t1	8.19e-11	58.5362
AFK27932.1	Ecdysone receptor [Spodoptera litura]	g10731.t1	8.22e-11	58.9214
OWR50480.1	apterous B alpha [Danaus plexippus plexippus]	g17118.t1	8.27e-11	59.6918
GBP96779.1	Transient receptor potential channel pyrexia [Eumeta japonica]	g28216.t1	8.32e-11	60.8474
AFK27932.1	Ecdysone receptor [Spodoptera litura]	g17049.t1	8.36e-11	58.9214
OWR44146.1	spalt protein [Danaus plexippus plexippus]	g31312.t1	8.54e-11	55.4546
XP_013165317.1	PREDICTED: neurogenic locus notch homolog protein 3-like [Papilio xuthus]	g1374.t1	8.9e-11	63.5438
OWR44146.1	spalt protein [Danaus plexippus plexippus]	g10193.t1	8.9e-11	61.2326
OWR46938.1	WntA signaling ligand [Danaus plexippus plexippus]	g3056.t1	9.08e-11	53.9138
OWR46938.1	WntA signaling ligand [Danaus plexippus plexippus]	g3775.t1	9.08e-11	53.9138
AFK27932.1	Ecdysone receptor [Spodoptera litura]	g6798.t1	9.15e-11	58.9214
OWR44146.1	spalt protein [Danaus plexippus plexippus]	g1720.t1	9.15e-11	61.2326
OWR44146.1	spalt protein [Danaus plexippus plexippus]	g6613.t1	9.58e-11	54.6842
OWR44146.1	spalt protein [Danaus plexippus plexippus]	g20603.t1	1.05e-10	60.8474
OWR46390.1	Phosphatidylinositol-4-phosphate 3-kinase C2 domain-containing beta polypeptide [Danaus plexippus plexippus]	g9579.t1	1.07e-10	57.3806
OWR44146.1	spalt protein [Danaus plexippus plexippus]	g24721.t1	1.19e-10	53.5286
OWR44146.1	spalt protein [Danaus plexippus plexippus]	g25835.t1	1.25e-10	60.8474
BAK19073.1	apterous A splicing isoform type A [Bombyx mori]	g32833.t1	1.27e-10	59.3066
BAK19073.1	apterous A splicing isoform type A [Bombyx mori]	g29418.t1	1.33e-10	58.9214
OWR44146.1	spalt protein [Danaus plexippus plexippus]	g31630.t1	1.44e-10	53.1434
OWR50480.1	apterous B alpha [Danaus plexippus plexippus]	g26074.t1	1.46e-10	53.1434
OWR44146.1	spalt protein [Danaus plexippus plexippus]	g11205.t1	1.47e-10	53.5286
KPI95412.1	Neurogenic locus Notch protein [Papilio xuthus]	g11032.t1	1.53e-10	56.6102
OWR44146.1	spalt protein [Danaus plexippus plexippus]	g17418.t1	1.54e-10	59.3066
OWR48139.1	Multiple C2 and transmembrane domain-containing protein 2 [Danaus plexippus plexippus]	g17581.t1	1.57e-10	61.2326
GBO98634.1	Ectoderm-neural cortex protein 1 [Eumeta japonica]	g7134.t1	1.6e-10	56.225
OWR44146.1	spalt protein [Danaus plexippus plexippus]	g5035.t2	1.62e-10	60.4622
OWR44146.1	spalt protein [Danaus plexippus plexippus]	g34293.t1	1.62e-10	60.077
OWR44146.1	spalt protein [Danaus plexippus plexippus]	g30089.t1	1.86e-10	60.077
OWR48140.1	Multiple C2 and transmembrane domain-containing protein 2 [Danaus plexippus plexippus]	g8160.t1	2.03e-10	56.6102
XP_022116237.1	transient receptor potential channel pyrexia isoform X1 [Pieris rapae]	g9387.t1	2.26e-10	60.077
OWR44146.1	spalt protein [Danaus plexippus plexippus]	g27495.t1	2.34e-10	57.3806
OWR44146.1	spalt protein [Danaus plexippus plexippus]	g22905.t1	2.64e-10	59.6918
OWR44146.1	spalt protein [Danaus plexippus plexippus]	g27040.t1	2.67e-10	58.151
XP_023946719.1	neurogenic locus Notch protein isoform X1 [Bicyclus anynana]	g14939.t2	2.87e-10	60.4622
OWR44146.1	spalt protein [Danaus plexippus plexippus]	g5014.t1	2.89e-10	58.9214
OWR46390.1	Phosphatidylinositol-4-phosphate 3-kinase C2 domain-containing beta polypeptide [Danaus plexippus plexippus]	g32906.t1	3.04e-10	62.3882
XP_021194189.1	transient receptor potential channel pyrexia [Helicoverpa armigera]	g25547.t1	3.06e-10	59.3066
OWR44146.1	spalt protein [Danaus plexippus plexippus]	g1899.t1	3.12e-10	56.9954
XP_011569112.1	PREDICTED: neurogenic locus Notch protein [Plutella xylostella]	g7650.t1	3.19e-10	58.5362
OWR44146.1	spalt protein [Danaus plexippus plexippus]	g11399.t1	3.36e-10	58.5362
OWR44146.1	spalt protein [Danaus plexippus plexippus]	g26787.t1	3.42e-10	59.3066
OWR44146.1	spalt protein [Danaus plexippus plexippus]	g24238.t1	3.44e-10	55.4546
OWR44146.1	spalt protein [Danaus plexippus plexippus]	g17164.t1	3.64e-10	59.6918
OWR44146.1	spalt protein [Danaus plexippus plexippus]	g33201.t1	3.64e-10	56.225
AFK27932.1	Ecdysone receptor [Spodoptera litura]	g11597.t1	3.65e-10	50.8322
OWR44146.1	spalt protein [Danaus plexippus plexippus]	g6907.t1	3.94e-10	52.7582
OWR44146.1	spalt protein [Danaus plexippus plexippus]	g14465.t1	3.98e-10	56.225
OWR44146.1	spalt protein [Danaus plexippus plexippus]	g33953.t1	4.08e-10	57.7658
OWR44146.1	spalt protein [Danaus plexippus plexippus]	g21136.t1	4.32e-10	51.9878
OWR44146.1	spalt protein [Danaus plexippus plexippus]	g18792.t1	4.53e-10	57.7658
XP_028158264.1	neurogenic locus Notch protein isoform X7 [Ostrinia furnacalis]	g16688.t1	4.6e-10	60.077
XP_022116237.1	transient receptor potential channel pyrexia isoform X1 [Pieris rapae]	g7085.t1	4.8e-10	60.4622
GBP29896.1	Homeotic protein distal-less [Eumeta japonica]	g4892.t1	4.81e-10	51.6026
OWR44146.1	spalt protein [Danaus plexippus plexippus]	g14051.t1	5.02e-10	51.2174
KOB75731.1	Hox cluster protein ShxD [Operophtera brumata]	g21282.t1	5.21e-10	53.1434
XP_026330048.1	ecdysone receptor isoform X4 [Hyposmocoma kahamanoa]	g28075.t1	5.26e-10	57.7658
XP_026315303.1	protein numb [Hyposmocoma kahamanoa]	g25086.t1	5.33e-10	55.4546
OWR44146.1	spalt protein [Danaus plexippus plexippus]	g32988.t1	5.36e-10	54.6842
GBP59257.1	Transient receptor potential channel pyrexia [Eumeta japonica]	g22015.t1	5.46e-10	50.0618
OWR44146.1	spalt protein [Danaus plexippus plexippus]	g14274.t1	5.67e-10	58.151
OWR44146.1	spalt protein [Danaus plexippus plexippus]	g19840.t1	5.69e-10	58.9214
OWR44146.1	spalt protein [Danaus plexippus plexippus]	g24181.t1	5.74e-10	58.5362
GBP73349.1	Neurogenic locus Notch protein [Eumeta japonica]	g18079.t1	5.85e-10	55.8398
OWR44146.1	spalt protein [Danaus plexippus plexippus]	g18667.t1	5.88e-10	58.9214
OWR44146.1	spalt protein [Danaus plexippus plexippus]	g22539.t1	5.97e-10	58.5362
XP_022815158.1	protein numb isoform X3 [Spodoptera litura]	g16444.t1	6.06e-10	58.151
XP_028029735.1	neurogenic locus Notch protein [Bombyx mandarina]	g26832.t1	6.41e-10	58.151
OWR44146.1	spalt protein [Danaus plexippus plexippus]	g29196.t1	6.53e-10	58.151
OWR44146.1	spalt protein [Danaus plexippus plexippus]	g23471.t1	6.58e-10	53.5286
OWR44146.1	spalt protein [Danaus plexippus plexippus]	g924.t1	6.61e-10	54.299
OWR44146.1	spalt protein [Danaus plexippus plexippus]	g15492.t1	6.66e-10	56.9954
OWR44146.1	spalt protein [Danaus plexippus plexippus]	g28943.t1	6.97e-10	56.6102
OWR44146.1	spalt protein [Danaus plexippus plexippus]	g8383.t1	7.11e-10	56.225
OWR44146.1	spalt protein [Danaus plexippus plexippus]	g18531.t1	7.41e-10	51.6026
OWR44146.1	spalt protein [Danaus plexippus plexippus]	g20128.t1	7.45e-10	56.225
OWR44146.1	spalt protein [Danaus plexippus plexippus]	g35074.t1	7.45e-10	51.6026
OWR44146.1	spalt protein [Danaus plexippus plexippus]	g30251.t1	7.64e-10	57.7658
GBP73349.1	Neurogenic locus Notch protein [Eumeta japonica]	g34539.t1	7.75e-10	54.299
OWR44146.1	spalt protein [Danaus plexippus plexippus]	g28854.t1	8e-10	51.9878
OWR44146.1	spalt protein [Danaus plexippus plexippus]	g8643.t1	8.08e-10	58.5362
BAK19080.1	apterous A splicing isoform type C [Bombyx mori]	g3669.t1	8.18e-10	56.6102
XP_026323998.1	neurogenic locus Notch protein isoform X2 [Hyposmocoma kahamanoa]	g21660.t1	8.5e-10	59.3066
OWR44146.1	spalt protein [Danaus plexippus plexippus]	g18589.t1	8.71e-10	53.1434
XP_022125910.1	neurogenic locus Notch protein isoform X1 [Pieris rapae]	g7643.t1	9.73e-10	57.3806
GBO98634.1	Ectoderm-neural cortex protein 1 [Eumeta japonica]	g12043.t1	1.07e-09	56.225
OWR44146.1	spalt protein [Danaus plexippus plexippus]	g2259.t1	1.09e-09	54.299
XP_013170945.1	PREDICTED: transient receptor potential channel pyrexia isoform X2 [Papilio xuthus]	g35001.t1	1.09e-09	56.6102
OWR44146.1	spalt protein [Danaus plexippus plexippus]	g31551.t1	1.1e-09	56.6102
OWR44146.1	spalt protein [Danaus plexippus plexippus]	g34002.t1	1.11e-09	55.0694
OWR50480.1	apterous B alpha [Danaus plexippus plexippus]	g1988.t1	1.11e-09	50.0618
OWR44146.1	spalt protein [Danaus plexippus plexippus]	g35089.t1	1.12e-09	55.0694
OWR44146.1	spalt protein [Danaus plexippus plexippus]	g24835.t1	1.16e-09	58.151
GBO98634.1	Ectoderm-neural cortex protein 1 [Eumeta japonica]	g27117.t1	1.17e-09	55.0694
OWR44146.1	spalt protein [Danaus plexippus plexippus]	g17778.t1	1.27e-09	57.3806
XP_026315303.1	protein numb [Hyposmocoma kahamanoa]	g8305.t1	1.36e-09	58.151
OWR44146.1	spalt protein [Danaus plexippus plexippus]	g24400.t1	1.36e-09	54.299
BAK19077.1	apterous B alpha [Bombyx mori]	g17674.t1	1.36e-09	55.4546
GBP04056.1	Transient receptor potential channel pyrexia [Eumeta japonica]	g15744.t1	1.39e-09	54.299
OWR44146.1	spalt protein [Danaus plexippus plexippus]	g6839.t1	1.39e-09	57.3806
OWR44146.1	spalt protein [Danaus plexippus plexippus]	g15358.t1	1.41e-09	58.5362
OWR44146.1	spalt protein [Danaus plexippus plexippus]	g17873.t1	1.43e-09	55.8398
OWR44146.1	spalt protein [Danaus plexippus plexippus]	g22986.t1	1.45e-09	53.5286
OWR44146.1	spalt protein [Danaus plexippus plexippus]	g20867.t1	1.46e-09	55.4546
OWR44146.1	spalt protein [Danaus plexippus plexippus]	g625.t1	1.5e-09	55.4546
GBO98634.1	Ectoderm-neural cortex protein 1 [Eumeta japonica]	g13748.t1	1.52e-09	55.8398
OWR44146.1	spalt protein [Danaus plexippus plexippus]	g7262.t1	1.54e-09	55.4546
OWR44146.1	spalt protein [Danaus plexippus plexippus]	g3895.t1	1.56e-09	53.9138
KOB77956.1	Homeobox protein engrailed [Operophtera brumata]	g31062.t1	1.57e-09	56.225
OWR44146.1	spalt protein [Danaus plexippus plexippus]	g17778.t2	1.64e-09	56.9954
OWR44146.1	spalt protein [Danaus plexippus plexippus]	g6540.t1	1.65e-09	56.6102
OWR44146.1	spalt protein [Danaus plexippus plexippus]	g2921.t1	1.66e-09	53.1434
OWR44146.1	spalt protein [Danaus plexippus plexippus]	g6839.t2	1.74e-09	56.9954
OWR44146.1	spalt protein [Danaus plexippus plexippus]	g33286.t1	1.82e-09	54.299
XP_022837346.1	multiple C2 and transmembrane domain-containing protein isoform X2 [Spodoptera litura]	g12725.t1	1.83e-09	55.0694
OWR44146.1	spalt protein [Danaus plexippus plexippus]	g6540.t2	1.89e-09	56.225
GBO98634.1	Ectoderm-neural cortex protein 1 [Eumeta japonica]	g13744.t1	1.94e-09	55.8398
GBO98634.1	Ectoderm-neural cortex protein 1 [Eumeta japonica]	g16797.t1	1.94e-09	55.8398
XP_026324002.1	neurogenic locus Notch protein isoform X6 [Hyposmocoma kahamanoa]	g21809.t1	1.97e-09	58.9214
XP_028160035.1	transient receptor potential channel pyrexia isoform X1 [Ostrinia furnacalis]	g4158.t1	1.99e-09	53.9138
XP_028160038.1	transient receptor potential channel pyrexia isoform X2 [Ostrinia furnacalis]	g18172.t1	2e-09	57.7658
XP_022118709.1	transient receptor potential channel pyrexia [Pieris rapae]	g15418.t1	2.03e-09	55.4546
AEP43793.2	black [Biston betularia]	g23839.t1	2.04e-09	56.225
OWR44146.1	spalt protein [Danaus plexippus plexippus]	g12881.t1	2.09e-09	55.4546
GBP04056.1	Transient receptor potential channel pyrexia [Eumeta japonica]	g5951.t1	2.09e-09	54.6842
OWR44146.1	spalt protein [Danaus plexippus plexippus]	g8129.t1	2.11e-09	57.7658
OWR44146.1	spalt protein [Danaus plexippus plexippus]	g34469.t1	2.15e-09	56.9954
KPJ09095.1	Protein apterous [Papilio machaon]	g33215.t1	2.16e-09	52.373
AFK27932.1	Ecdysone receptor [Spodoptera litura]	g2438.t1	2.22e-09	50.447
OWR44146.1	spalt protein [Danaus plexippus plexippus]	g17919.t1	2.23e-09	51.2174
OWR44146.1	spalt protein [Danaus plexippus plexippus]	g5485.t1	2.28e-09	54.299
OWR44146.1	spalt protein [Danaus plexippus plexippus]	g10521.t1	2.28e-09	56.225
XP_028025674.1	LOW QUALITY PROTEIN: neurogenic locus notch homolog protein 2-like [Bombyx mandarina]	g36071.t1	2.29e-09	55.0694
OWR44146.1	spalt protein [Danaus plexippus plexippus]	g7498.t1	2.31e-09	55.4546
GBP96779.1	Transient receptor potential channel pyrexia [Eumeta japonica]	g21468.t2	2.41e-09	57.3806
OWR44146.1	spalt protein [Danaus plexippus plexippus]	g7497.t1	2.69e-09	54.299
OWR44146.1	spalt protein [Danaus plexippus plexippus]	g18021.t1	2.69e-09	56.6102
OWR48139.1	Multiple C2 and transmembrane domain-containing protein 2 [Danaus plexippus plexippus]	g24154.t1	2.75e-09	58.5362
OWR48139.1	Multiple C2 and transmembrane domain-containing protein 2 [Danaus plexippus plexippus]	g24154.t3	2.8e-09	58.5362
OWR48139.1	Multiple C2 and transmembrane domain-containing protein 2 [Danaus plexippus plexippus]	g24154.t2	2.81e-09	58.5362
OWR44146.1	spalt protein [Danaus plexippus plexippus]	g35075.t1	2.96e-09	51.9878
OWR44146.1	spalt protein [Danaus plexippus plexippus]	g30758.t1	2.99e-09	56.225
XP_013184429.1	PREDICTED: transient receptor potential channel pyrexia isoform X1 [Amyelois transitella]	g26777.t1	3.04e-09	53.1434
OWR44146.1	spalt protein [Danaus plexippus plexippus]	g18300.t1	3.07e-09	52.7582
OWR44146.1	spalt protein [Danaus plexippus plexippus]	g29909.t1	3.22e-09	55.0694
OWR44146.1	spalt protein [Danaus plexippus plexippus]	g30238.t1	3.41e-09	55.0694
OWR44146.1	spalt protein [Danaus plexippus plexippus]	g25705.t1	3.61e-09	54.299
GBP73349.1	Neurogenic locus Notch protein [Eumeta japonica]	g22235.t1	3.61e-09	56.225
OWR44146.1	spalt protein [Danaus plexippus plexippus]	g35093.t1	3.61e-09	55.0694
XP_028025674.1	LOW QUALITY PROTEIN: neurogenic locus notch homolog protein 2-like [Bombyx mandarina]	g30562.t1	3.63e-09	55.8398
XP_028025674.1	LOW QUALITY PROTEIN: neurogenic locus notch homolog protein 2-like [Bombyx mandarina]	g30579.t1	3.63e-09	55.8398
XP_013183510.1	PREDICTED: homeotic protein distal-less [Amyelois transitella]	g8788.t1	3.68e-09	53.5286
OWR44146.1	spalt protein [Danaus plexippus plexippus]	g25587.t1	3.7e-09	51.9878
XP_026764390.1	neurogenic locus Notch protein isoform X3 [Galleria mellonella]	g27103.t1	3.72e-09	56.6102
KPJ02943.1	Protein spaetzle [Papilio xuthus]	g7588.t1	3.76e-09	51.2174
OWR44146.1	spalt protein [Danaus plexippus plexippus]	g18490.t2	3.78e-09	55.0694
XP_021193109.1	mothers against decapentaplegic homolog 6 [Helicoverpa armigera]	g14202.t1	3.8e-09	51.6026
OWR44146.1	spalt protein [Danaus plexippus plexippus]	g35086.t1	3.87e-09	51.9878
OWR44146.1	spalt protein [Danaus plexippus plexippus]	g19410.t1	3.91e-09	55.8398
OWR44146.1	spalt protein [Danaus plexippus plexippus]	g21101.t1	3.93e-09	56.6102
OWR44146.1	spalt protein [Danaus plexippus plexippus]	g35079.t1	4.47e-09	54.6842
KPJ02943.1	Protein spaetzle [Papilio xuthus]	g7588.t2	4.49e-09	51.2174
OWR44146.1	spalt protein [Danaus plexippus plexippus]	g1877.t1	4.55e-09	53.9138
OWR44146.1	spalt protein [Danaus plexippus plexippus]	g9692.t1	4.59e-09	51.6026
OWR44146.1	spalt protein [Danaus plexippus plexippus]	g7506.t1	4.62e-09	52.373
OWR44146.1	spalt protein [Danaus plexippus plexippus]	g7410.t1	4.77e-09	53.9138
OWR44146.1	spalt protein [Danaus plexippus plexippus]	g23592.t1	4.77e-09	53.9138
OWR44146.1	spalt protein [Danaus plexippus plexippus]	g24999.t1	4.85e-09	49.2914
OWR44146.1	spalt protein [Danaus plexippus plexippus]	g30065.t1	4.93e-09	55.8398
OWR44146.1	spalt protein [Danaus plexippus plexippus]	g13435.t1	4.97e-09	56.225
XP_026315092.1	transient receptor potential channel pyrexia [Hyposmocoma kahamanoa]	g16489.t1	5.42e-09	57.7658
KPJ09095.1	Protein apterous [Papilio machaon]	g11717.t1	5.49e-09	50.8322
OWR48139.1	Multiple C2 and transmembrane domain-containing protein 2 [Danaus plexippus plexippus]	g18081.t1	5.58e-09	48.1358
OWR44146.1	spalt protein [Danaus plexippus plexippus]	g35082.t1	5.64e-09	51.6026
DAA64851.1	TPA_inf: Hox cluster protein Shx15 [Bombyx mori]	g7404.t1	5.9e-09	48.1358
OWR44146.1	spalt protein [Danaus plexippus plexippus]	g31753.t1	6.01e-09	51.2174
OWR44146.1	spalt protein [Danaus plexippus plexippus]	g35083.t1	6.14e-09	51.6026
OWR44146.1	spalt protein [Danaus plexippus plexippus]	g23644.t1	6.24e-09	55.4546
XP_026332247.1	transient receptor potential channel pyrexia [Hyposmocoma kahamanoa]	g20882.t1	7.17e-09	48.521
BAK19078.1	apterous B beta [Bombyx mori]	g17843.t1	7.42e-09	50.0618
BAM18911.1	black marking-specific secreted protein [Papilio polytes]	g35439.t1	7.56e-09	53.5286
OWR44146.1	spalt protein [Danaus plexippus plexippus]	g35634.t1	7.62e-09	55.4546
GBP04056.1	Transient receptor potential channel pyrexia [Eumeta japonica]	g8858.t1	7.81e-09	52.7582
OWR44146.1	spalt protein [Danaus plexippus plexippus]	g23466.t1	7.92e-09	50.0618
XP_013186206.1	PREDICTED: mothers against decapentaplegic homolog 4 isoform X3 [Amyelois transitella]	g35784.t1	8.13e-09	46.9802
OWR44146.1	spalt protein [Danaus plexippus plexippus]	g29118.t1	8.26e-09	54.299
OWR44146.1	spalt protein [Danaus plexippus plexippus]	g10193.t2	8.4e-09	47.7506
OWR44146.1	spalt protein [Danaus plexippus plexippus]	g14466.t1	8.61e-09	48.521
BAK19078.1	apterous B beta [Bombyx mori]	g3861.t1	8.92e-09	47.7506
OWR44146.1	spalt protein [Danaus plexippus plexippus]	g954.t1	9.05e-09	50.0618
GBO99612.1	Mothers against decapentaplegic homolog 4 [Eumeta japonica]	g6616.t1	9.52e-09	47.3654
XP_013184429.1	PREDICTED: transient receptor potential channel pyrexia isoform X1 [Amyelois transitella]	g35779.t1	9.69e-09	52.373
OWR44146.1	spalt protein [Danaus plexippus plexippus]	g35071.t1	1.03e-08	50.8322
OWR44146.1	spalt protein [Danaus plexippus plexippus]	g35076.t1	1.05e-08	50.8322
OWR46390.1	Phosphatidylinositol-4-phosphate 3-kinase C2 domain-containing beta polypeptide [Danaus plexippus plexippus]	g450.t1	1.06e-08	52.7582
XP_013184439.1	PREDICTED: transient receptor potential channel pyrexia isoform X2 [Amyelois transitella]	g21468.t1	1.07e-08	55.4546
XP_023945739.1	transient receptor potential channel pyrexia [Bicyclus anynana]	g9848.t1	1.09e-08	50.0618
OWR44146.1	spalt protein [Danaus plexippus plexippus]	g35078.t1	1.09e-08	50.0618
OWR50480.1	apterous B alpha [Danaus plexippus plexippus]	g24761.t1	1.1e-08	53.1434
OWR44146.1	spalt protein [Danaus plexippus plexippus]	g10423.t1	1.12e-08	55.0694
OWR44146.1	spalt protein [Danaus plexippus plexippus]	g433.t1	1.14e-08	52.373
OWR44146.1	spalt protein [Danaus plexippus plexippus]	g7504.t1	1.14e-08	52.7582
OWR44146.1	spalt protein [Danaus plexippus plexippus]	g6378.t1	1.16e-08	51.9878
OWR44146.1	spalt protein [Danaus plexippus plexippus]	g34052.t1	1.17e-08	53.1434
OWR44146.1	spalt protein [Danaus plexippus plexippus]	g2922.t1	1.19e-08	49.2914
OWR44146.1	spalt protein [Danaus plexippus plexippus]	g1278.t1	1.2e-08	56.225
XP_022817517.1	transient receptor potential channel pyrexia isoform X2 [Spodoptera litura]	g21913.t1	1.24e-08	54.299
OWR44146.1	spalt protein [Danaus plexippus plexippus]	g15357.t1	1.26e-08	53.9138
OWR44146.1	spalt protein [Danaus plexippus plexippus]	g20651.t1	1.27e-08	53.1434
OWR44146.1	spalt protein [Danaus plexippus plexippus]	g18304.t1	1.29e-08	55.0694
OWR44146.1	spalt protein [Danaus plexippus plexippus]	g5785.t1	1.33e-08	53.9138
OWR44146.1	spalt protein [Danaus plexippus plexippus]	g8751.t1	1.33e-08	53.1434
KPI94668.1	Zinc finger CCCH domain-containing protein 13 [Papilio xuthus]	g10224.t1	1.37e-08	53.5286
OWR44146.1	spalt protein [Danaus plexippus plexippus]	g4610.t1	1.47e-08	52.373
OWR44146.1	spalt protein [Danaus plexippus plexippus]	g23559.t1	1.47e-08	52.373
OWR44146.1	spalt protein [Danaus plexippus plexippus]	g23563.t1	1.47e-08	52.373
OWR44146.1	spalt protein [Danaus plexippus plexippus]	g35077.t1	1.57e-08	50.0618
XP_013165317.1	PREDICTED: neurogenic locus notch homolog protein 3-like [Papilio xuthus]	g21592.t1	1.59e-08	51.6026
XP_013165317.1	PREDICTED: neurogenic locus notch homolog protein 3-like [Papilio xuthus]	g1347.t1	1.62e-08	53.9138
XP_028025674.1	LOW QUALITY PROTEIN: neurogenic locus notch homolog protein 2-like [Bombyx mandarina]	g25217.t1	1.65e-08	54.299
XP_013177440.1	PREDICTED: protein naked cuticle homolog [Papilio xuthus]	g20202.t1	1.66e-08	49.6766
OWR44146.1	spalt protein [Danaus plexippus plexippus]	g29835.t1	1.67e-08	55.4546
XP_026324002.1	neurogenic locus Notch protein isoform X6 [Hyposmocoma kahamanoa]	g25907.t1	1.79e-08	55.0694
OWR44146.1	spalt protein [Danaus plexippus plexippus]	g31150.t1	1.85e-08	51.2174
OWR44146.1	spalt protein [Danaus plexippus plexippus]	g34823.t1	1.94e-08	46.9802
OWR44146.1	spalt protein [Danaus plexippus plexippus]	g29773.t1	1.95e-08	52.7582
OWR44146.1	spalt protein [Danaus plexippus plexippus]	g20156.t1	2.04e-08	50.447
AIB07879.1	Hox cluster protein ShxA [Cameraria ohridella]	g25805.t1	2.12e-08	46.9802
GBO98634.1	Ectoderm-neural cortex protein 1 [Eumeta japonica]	g11134.t1	2.14e-08	51.9878
OWR44146.1	spalt protein [Danaus plexippus plexippus]	g24834.t1	2.19e-08	53.5286
OWR44146.1	spalt protein [Danaus plexippus plexippus]	g16642.t1	2.19e-08	52.7582
AIB07879.1	Hox cluster protein ShxA [Cameraria ohridella]	g26790.t1	2.27e-08	46.9802
GBO98634.1	Ectoderm-neural cortex protein 1 [Eumeta japonica]	g23947.t1	2.3e-08	51.9878
OWR44146.1	spalt protein [Danaus plexippus plexippus]	g31614.t1	2.32e-08	48.521
OWR44146.1	spalt protein [Danaus plexippus plexippus]	g29287.t1	2.32e-08	51.6026
XP_011569112.1	PREDICTED: neurogenic locus Notch protein [Plutella xylostella]	g22328.t1	2.33e-08	47.7506
OWR44146.1	spalt protein [Danaus plexippus plexippus]	g29287.t3	2.36e-08	51.9878
OWR44146.1	spalt protein [Danaus plexippus plexippus]	g6623.t1	2.36e-08	53.1434
GBO98634.1	Ectoderm-neural cortex protein 1 [Eumeta japonica]	g25175.t1	2.43e-08	51.6026
AIB07878.1	Hox cluster protein ShxA [Callimorpha dominula]	g20739.t1	2.43e-08	46.9802
OWR44146.1	spalt protein [Danaus plexippus plexippus]	g22101.t1	2.44e-08	52.7582
OWR44146.1	spalt protein [Danaus plexippus plexippus]	g13348.t1	2.44e-08	52.7582
OWR44146.1	spalt protein [Danaus plexippus plexippus]	g21078.t2	2.46e-08	53.5286
OWR44146.1	spalt protein [Danaus plexippus plexippus]	g21078.t1	2.5e-08	53.1434
OWR44146.1	spalt protein [Danaus plexippus plexippus]	g7088.t1	2.53e-08	52.373
XP_021194287.1	transient receptor potential channel pyrexia isoform X1 [Helicoverpa armigera]	g18762.t1	2.54e-08	47.7506
KOB67879.1	Transient receptor potential channel pyrexia [Operophtera brumata]	g31273.t1	2.56e-08	48.9062
OWR44146.1	spalt protein [Danaus plexippus plexippus]	g4021.t1	2.61e-08	46.595
OWR44146.1	spalt protein [Danaus plexippus plexippus]	g29287.t2	2.63e-08	51.6026
GBO98634.1	Ectoderm-neural cortex protein 1 [Eumeta japonica]	g19259.t1	2.69e-08	49.6766
OWR44146.1	spalt protein [Danaus plexippus plexippus]	g35081.t1	2.72e-08	50.0618
XP_011565170.1	PREDICTED: phosphatidylinositol 4-phosphate 3-kinase C2 domain-containing subunit alpha-like [Plutella xylostella]	g6106.t1	2.73e-08	55.8398
OWR44146.1	spalt protein [Danaus plexippus plexippus]	g35080.t1	2.76e-08	49.6766
GBP59257.1	Transient receptor potential channel pyrexia [Eumeta japonica]	g22662.t1	2.81e-08	52.373
OWR44146.1	spalt protein [Danaus plexippus plexippus]	g6885.t1	2.89e-08	52.7582
GBP59257.1	Transient receptor potential channel pyrexia [Eumeta japonica]	g18492.t1	2.91e-08	52.373
GBP96778.1	Transient receptor potential channel pyrexia [Eumeta japonica]	g26054.t1	2.99e-08	51.2174
OWR46390.1	Phosphatidylinositol-4-phosphate 3-kinase C2 domain-containing beta polypeptide [Danaus plexippus plexippus]	g33121.t1	3.01e-08	50.447
OWR44146.1	spalt protein [Danaus plexippus plexippus]	g29287.t4	3.1e-08	51.6026
OWR44146.1	spalt protein [Danaus plexippus plexippus]	g14111.t1	3.15e-08	51.9878
XP_012551411.1	apterous A isoform X3 [Bombyx mori]	g14462.t1	3.15e-08	48.1358
XP_022125910.1	neurogenic locus Notch protein isoform X1 [Pieris rapae]	g34701.t1	3.17e-08	52.373
GBO98634.1	Ectoderm-neural cortex protein 1 [Eumeta japonica]	g19258.t1	3.18e-08	49.2914
OWR44146.1	spalt protein [Danaus plexippus plexippus]	g24833.t1	3.33e-08	51.9878
GBO98634.1	Ectoderm-neural cortex protein 1 [Eumeta japonica]	g2467.t1	3.38e-08	49.2914
OWR44146.1	spalt protein [Danaus plexippus plexippus]	g9959.t1	3.45e-08	52.7582
GBP00197.1	Neurogenic locus Notch protein [Eumeta japonica]	g25907.t2	3.51e-08	49.6766
XP_012551411.1	apterous A isoform X3 [Bombyx mori]	g32338.t1	3.51e-08	50.8322
OWR44146.1	spalt protein [Danaus plexippus plexippus]	g32023.t1	3.53e-08	51.6026
OWR44146.1	spalt protein [Danaus plexippus plexippus]	g32032.t1	3.53e-08	51.6026
OWR44146.1	spalt protein [Danaus plexippus plexippus]	g4022.t1	3.55e-08	52.7582
OWR44146.1	spalt protein [Danaus plexippus plexippus]	g28425.t1	3.56e-08	46.595
ABS00248.1	ecdysone receptor A isoform [Omphisa fuscidentalis]	g24876.t1	3.59e-08	50.8322
OWR44146.1	spalt protein [Danaus plexippus plexippus]	g28210.t1	3.72e-08	53.5286
XP_023945739.1	transient receptor potential channel pyrexia [Bicyclus anynana]	g4157.t1	3.72e-08	46.595
OWR44146.1	spalt protein [Danaus plexippus plexippus]	g6620.t1	3.73e-08	52.373
GBO98634.1	Ectoderm-neural cortex protein 1 [Eumeta japonica]	g15234.t1	3.74e-08	51.2174
OWR44146.1	spalt protein [Danaus plexippus plexippus]	g35070.t1	3.9e-08	51.6026
XP_021207942.1	apterous A isoform X2 [Bombyx mori]	g16474.t1	3.98e-08	47.3654
OWR44146.1	spalt protein [Danaus plexippus plexippus]	g1159.t1	3.99e-08	51.6026
KPJ14564.1	Neurogenic locus Notch protein [Papilio machaon]	g3140.t1	4.07e-08	48.1358
OWR44146.1	spalt protein [Danaus plexippus plexippus]	g6367.t1	4.07e-08	51.6026
OWR44146.1	spalt protein [Danaus plexippus plexippus]	g25000.t1	4.08e-08	48.521
OWR44146.1	spalt protein [Danaus plexippus plexippus]	g6624.t1	4.27e-08	52.7582
XP_026314823.1	neurogenic locus notch homolog protein 3-like isoform X1 [Hyposmocoma kahamanoa]	g21648.t1	4.29e-08	45.8246
XP_026314823.1	neurogenic locus notch homolog protein 3-like isoform X1 [Hyposmocoma kahamanoa]	g2357.t1	4.29e-08	45.8246
XP_026314823.1	neurogenic locus notch homolog protein 3-like isoform X1 [Hyposmocoma kahamanoa]	g994.t1	4.29e-08	45.8246
GBP04056.1	Transient receptor potential channel pyrexia [Eumeta japonica]	g34703.t1	4.37e-08	50.0618
OWR44146.1	spalt protein [Danaus plexippus plexippus]	g35072.t1	4.39e-08	48.521
OWR44146.1	spalt protein [Danaus plexippus plexippus]	g19300.t1	4.48e-08	50.8322
OWR44146.1	spalt protein [Danaus plexippus plexippus]	g7503.t1	4.57e-08	51.6026
XP_011554413.1	PREDICTED: transient receptor potential channel pyrexia [Plutella xylostella]	g7791.t1	4.67e-08	47.3654
OWR50480.1	apterous B alpha [Danaus plexippus plexippus]	g14670.t1	4.83e-08	49.2914
OWR44146.1	spalt protein [Danaus plexippus plexippus]	g9233.t1	4.84e-08	53.1434
OWR44146.1	spalt protein [Danaus plexippus plexippus]	g27988.t1	4.91e-08	52.373
OWR44146.1	spalt protein [Danaus plexippus plexippus]	g23556.t1	4.96e-08	52.373
OWR44146.1	spalt protein [Danaus plexippus plexippus]	g7135.t1	5.06e-08	51.9878
OWR44146.1	spalt protein [Danaus plexippus plexippus]	g27990.t1	5.25e-08	51.6026
OWR44146.1	spalt protein [Danaus plexippus plexippus]	g32119.t1	5.26e-08	50.447
OWR50480.1	apterous B alpha [Danaus plexippus plexippus]	g6524.t1	5.38e-08	50.0618
OWR44146.1	spalt protein [Danaus plexippus plexippus]	g23534.t1	5.41e-08	51.2174
OWR44146.1	spalt protein [Danaus plexippus plexippus]	g14021.t1	5.41e-08	53.9138
OWR44146.1	spalt protein [Danaus plexippus plexippus]	g35625.t1	5.46e-08	53.1434
OWR44146.1	spalt protein [Danaus plexippus plexippus]	g35084.t1	5.55e-08	48.9062
KOB75731.1	Hox cluster protein ShxD [Operophtera brumata]	g33743.t1	5.91e-08	48.9062
OWR44146.1	spalt protein [Danaus plexippus plexippus]	g22642.t1	6.34e-08	48.9062
GBO98634.1	Ectoderm-neural cortex protein 1 [Eumeta japonica]	g29834.t1	6.44e-08	46.2098
OWR44146.1	spalt protein [Danaus plexippus plexippus]	g5774.t1	6.46e-08	50.8322
KOB66732.1	Hox cluster protein ShxA [Operophtera brumata]	g3666.t1	6.55e-08	44.2838
XP_026314823.1	neurogenic locus notch homolog protein 3-like isoform X1 [Hyposmocoma kahamanoa]	g2923.t1	6.61e-08	45.4394
OWR44146.1	spalt protein [Danaus plexippus plexippus]	g1286.t1	6.63e-08	50.0618
OWR44146.1	spalt protein [Danaus plexippus plexippus]	g5672.t1	6.72e-08	49.2914
OWR44146.1	spalt protein [Danaus plexippus plexippus]	g15313.t1	6.75e-08	50.447
OWR50480.1	apterous B alpha [Danaus plexippus plexippus]	g7593.t1	7.3e-08	50.0618
XP_022837346.1	multiple C2 and transmembrane domain-containing protein isoform X2 [Spodoptera litura]	g12006.t1	7.41e-08	53.1434
OWR50480.1	apterous B alpha [Danaus plexippus plexippus]	g12317.t1	7.43e-08	50.0618
OWR44146.1	spalt protein [Danaus plexippus plexippus]	g23780.t1	7.92e-08	52.7582
OWR44146.1	spalt protein [Danaus plexippus plexippus]	g35088.t1	8.14e-08	48.521
OWR44146.1	spalt protein [Danaus plexippus plexippus]	g20370.t1	8.26e-08	50.0618
OWR50479.1	apterous A splicing isoform type B [Danaus plexippus plexippus]	g29420.t1	8.29e-08	47.3654
OWR44146.1	spalt protein [Danaus plexippus plexippus]	g20370.t2	8.47e-08	50.0618
KPI92351.1	Transient receptor potential channel pyrexia [Papilio xuthus]	g25698.t1	9.26e-08	51.2174
OWR44146.1	spalt protein [Danaus plexippus plexippus]	g87.t1	9.88e-08	45.4394
OWR44146.1	spalt protein [Danaus plexippus plexippus]	g24837.t1	1.06e-07	48.1358
OWR44146.1	spalt protein [Danaus plexippus plexippus]	g35180.t1	1.07e-07	49.6766
XP_026493686.1	protein naked cuticle homolog [Vanessa tameamea]	g2872.t1	1.07e-07	46.2098
XP_026735244.1	transient receptor potential channel pyrexia [Trichoplusia ni]	g24420.t1	1.07e-07	52.373
OWR45792.1	neurogenic locus notch protein 2 [Danaus plexippus plexippus]	g6742.t1	1.08e-07	45.4394
OWR44146.1	spalt protein [Danaus plexippus plexippus]	g6549.t1	1.13e-07	43.8986
OWR44146.1	spalt protein [Danaus plexippus plexippus]	g36111.t1	1.15e-07	50.0618
OWR44146.1	spalt protein [Danaus plexippus plexippus]	g32718.t2	1.16e-07	52.7582
XP_026493686.1	protein naked cuticle homolog [Vanessa tameamea]	g21040.t1	1.18e-07	46.2098
OWR44146.1	spalt protein [Danaus plexippus plexippus]	g22738.t1	1.2e-07	50.447
GBP96778.1	Transient receptor potential channel pyrexia [Eumeta japonica]	g13911.t1	1.22e-07	51.2174
GBP96778.1	Transient receptor potential channel pyrexia [Eumeta japonica]	g32711.t1	1.25e-07	50.8322
OWR44146.1	spalt protein [Danaus plexippus plexippus]	g7500.t1	1.29e-07	50.0618
OWR44146.1	spalt protein [Danaus plexippus plexippus]	g20193.t2	1.31e-07	48.1358
AIB07908.1	Hox cluster protein ShxA [Polygonia c-album]	g9053.t1	1.32e-07	48.9062
OWR44146.1	spalt protein [Danaus plexippus plexippus]	g3146.t1	1.34e-07	48.521
OWR44146.1	spalt protein [Danaus plexippus plexippus]	g28588.t1	1.37e-07	50.0618
OWR44146.1	spalt protein [Danaus plexippus plexippus]	g8754.t1	1.46e-07	49.6766
OWR44146.1	spalt protein [Danaus plexippus plexippus]	g17883.t1	1.52e-07	49.2914
XP_026314823.1	neurogenic locus notch homolog protein 3-like isoform X1 [Hyposmocoma kahamanoa]	g23470.t1	1.56e-07	50.447
OWR44146.1	spalt protein [Danaus plexippus plexippus]	g35626.t1	1.7e-07	51.9878
OWR44146.1	spalt protein [Danaus plexippus plexippus]	g18790.t1	1.7e-07	46.595
XP_026501079.1	neurogenic locus Notch protein [Vanessa tameamea]	g3162.t1	1.76e-07	48.9062
XP_013186205.1	PREDICTED: mothers against decapentaplegic homolog 4 isoform X2 [Amyelois transitella]	g31263.t1	1.81e-07	47.3654
GBO98634.1	Ectoderm-neural cortex protein 1 [Eumeta japonica]	g757.t1	1.83e-07	48.9062
OWR44146.1	spalt protein [Danaus plexippus plexippus]	g15797.t1	1.92e-07	45.0542
OWR44146.1	spalt protein [Danaus plexippus plexippus]	g29777.t1	1.93e-07	41.9726
XP_022837347.1	multiple C2 and transmembrane domain-containing protein isoform X3 [Spodoptera litura]	g7230.t1	1.95e-07	44.2838
XP_026735244.1	transient receptor potential channel pyrexia [Trichoplusia ni]	g33974.t1	1.97e-07	45.8246
OWR44146.1	spalt protein [Danaus plexippus plexippus]	g33723.t1	2.07e-07	48.9062
OWR44146.1	spalt protein [Danaus plexippus plexippus]	g6049.t1	2.1e-07	50.447
XP_026314823.1	neurogenic locus notch homolog protein 3-like isoform X1 [Hyposmocoma kahamanoa]	g9790.t1	2.11e-07	52.7582
OWR44146.1	spalt protein [Danaus plexippus plexippus]	g6615.t1	2.14e-07	49.2914
OWR44146.1	spalt protein [Danaus plexippus plexippus]	g22362.t1	2.16e-07	46.595
OWR44146.1	spalt protein [Danaus plexippus plexippus]	g6049.t2	2.19e-07	50.447
GBO98634.1	Ectoderm-neural cortex protein 1 [Eumeta japonica]	g33937.t2	2.29e-07	49.6766
OWR44146.1	spalt protein [Danaus plexippus plexippus]	g12614.t1	2.34e-07	49.6766
XP_026332169.1	mothers against decapentaplegic homolog 4 [Hyposmocoma kahamanoa]	g1983.t1	2.41e-07	51.9878
GBO98634.1	Ectoderm-neural cortex protein 1 [Eumeta japonica]	g33937.t1	2.57e-07	49.2914
OWR44146.1	spalt protein [Danaus plexippus plexippus]	g6622.t1	2.57e-07	49.6766
OWR44146.1	spalt protein [Danaus plexippus plexippus]	g14778.t1	2.58e-07	48.521
AFK27932.1	Ecdysone receptor [Spodoptera litura]	g33640.t1	2.65e-07	45.8246
OWR43523.1	black [Danaus plexippus plexippus]	g15270.t1	2.65e-07	49.2914
XP_022116239.1	transient receptor potential channel pyrexia isoform X2 [Pieris rapae]	g31726.t1	2.75e-07	51.2174
GBO98634.1	Ectoderm-neural cortex protein 1 [Eumeta japonica]	g6644.t1	2.83e-07	48.521
OWR44146.1	spalt protein [Danaus plexippus plexippus]	g28097.t1	2.9e-07	49.2914
XP_026314823.1	neurogenic locus notch homolog protein 3-like isoform X1 [Hyposmocoma kahamanoa]	g24071.t2	2.9e-07	50.447
XP_026314823.1	neurogenic locus notch homolog protein 3-like isoform X1 [Hyposmocoma kahamanoa]	g24071.t1	2.97e-07	50.447
GBO98634.1	Ectoderm-neural cortex protein 1 [Eumeta japonica]	g17281.t1	2.98e-07	46.9802
GBO98634.1	Ectoderm-neural cortex protein 1 [Eumeta japonica]	g17285.t1	2.98e-07	46.9802
GBO98634.1	Ectoderm-neural cortex protein 1 [Eumeta japonica]	g34676.t1	2.98e-07	46.9802
OWR44146.1	spalt protein [Danaus plexippus plexippus]	g5167.t1	3e-07	50.8322
DAA64851.1	TPA_inf: Hox cluster protein Shx15 [Bombyx mori]	g12689.t1	3.05e-07	45.4394
XP_023945739.1	transient receptor potential channel pyrexia [Bicyclus anynana]	g31532.t1	3.18e-07	49.2914
XP_023945739.1	transient receptor potential channel pyrexia [Bicyclus anynana]	g31532.t3	3.2e-07	49.2914
XP_028160039.1	transient receptor potential channel pyrexia isoform X3 [Ostrinia furnacalis]	g32520.t1	3.29e-07	42.3578
XP_028158264.1	neurogenic locus Notch protein isoform X7 [Ostrinia furnacalis]	g19133.t1	3.3e-07	51.2174
KPI94668.1	Zinc finger CCCH domain-containing protein 13 [Papilio xuthus]	g23697.t1	3.35e-07	50.0618
OWR44146.1	spalt protein [Danaus plexippus plexippus]	g6331.t1	3.52e-07	51.2174
XP_014359206.1	PREDICTED: LOW QUALITY PROTEIN: neurogenic locus Notch protein-like [Papilio machaon]	g4650.t1	3.56e-07	49.2914
OWR44146.1	spalt protein [Danaus plexippus plexippus]	g29295.t1	3.61e-07	48.1358
XP_022116239.1	transient receptor potential channel pyrexia isoform X2 [Pieris rapae]	g31726.t2	3.75e-07	50.8322
AIB07878.1	Hox cluster protein ShxA [Callimorpha dominula]	g25878.t1	3.76e-07	45.8246
KOB66732.1	Hox cluster protein ShxA [Operophtera brumata]	g16604.t1	3.79e-07	44.2838
KPI94668.1	Zinc finger CCCH domain-containing protein 13 [Papilio xuthus]	g22533.t1	3.81e-07	46.595
OWR44146.1	spalt protein [Danaus plexippus plexippus]	g24373.t1	3.89e-07	51.2174
OWR48139.1	Multiple C2 and transmembrane domain-containing protein 2 [Danaus plexippus plexippus]	g1234.t1	3.96e-07	48.9062
OWR44146.1	spalt protein [Danaus plexippus plexippus]	g24302.t1	3.96e-07	48.9062
GBO98634.1	Ectoderm-neural cortex protein 1 [Eumeta japonica]	g20203.t1	4.25e-07	47.3654
OWR44146.1	spalt protein [Danaus plexippus plexippus]	g11386.t1	4.26e-07	47.3654
GBO99612.1	Mothers against decapentaplegic homolog 4 [Eumeta japonica]	g19551.t1	4.48e-07	45.4394
OWR44146.1	spalt protein [Danaus plexippus plexippus]	g15796.t1	4.51e-07	50.0618
OWR44146.1	spalt protein [Danaus plexippus plexippus]	g6503.t1	4.61e-07	47.7506
OWR44146.1	spalt protein [Danaus plexippus plexippus]	g33709.t1	4.69e-07	49.6766
XP_021194287.1	transient receptor potential channel pyrexia isoform X1 [Helicoverpa armigera]	g23142.t1	4.83e-07	46.595
XP_026483662.1	homeotic protein distal-less isoform X3 [Vanessa tameamea]	g32529.t1	4.88e-07	46.2098
AFK27932.1	Ecdysone receptor [Spodoptera litura]	g25160.t1	4.95e-07	42.3578
GBP73349.1	Neurogenic locus Notch protein [Eumeta japonica]	g8850.t1	4.99e-07	51.2174
OWR44146.1	spalt protein [Danaus plexippus plexippus]	g14424.t1	5.17e-07	46.2098
OWR46938.1	WntA signaling ligand [Danaus plexippus plexippus]	g4442.t1	5.2e-07	43.1282
OWR44146.1	spalt protein [Danaus plexippus plexippus]	g24353.t1	5.22e-07	46.2098
XP_014359206.1	PREDICTED: LOW QUALITY PROTEIN: neurogenic locus Notch protein-like [Papilio machaon]	g4164.t1	5.23e-07	40.817
OWR44146.1	spalt protein [Danaus plexippus plexippus]	g2251.t1	5.31e-07	45.0542
GBO98634.1	Ectoderm-neural cortex protein 1 [Eumeta japonica]	g3773.t1	5.35e-07	46.9802
OWR44146.1	spalt protein [Danaus plexippus plexippus]	g35085.t1	5.38e-07	50.447
XP_021206939.1	calcium-activated potassium channel slowpoke isoform X1 [Bombyx mori]	g1520.t1	5.57e-07	48.9062
OWR44146.1	spalt protein [Danaus plexippus plexippus]	g33706.t1	5.59e-07	45.4394
AAT44358.1	calcium-activated potassium channel alpha subunit [Manduca sexta]	g34336.t1	5.63e-07	48.9062
OWR44146.1	spalt protein [Danaus plexippus plexippus]	g33682.t1	5.66e-07	48.521
XP_026315303.1	protein numb [Hyposmocoma kahamanoa]	g30644.t1	5.77e-07	48.1358
OWR44146.1	spalt protein [Danaus plexippus plexippus]	g27516.t1	5.81e-07	49.2914
OWR46938.1	WntA signaling ligand [Danaus plexippus plexippus]	g30404.t1	5.82e-07	41.9726
OWR44146.1	spalt protein [Danaus plexippus plexippus]	g33713.t1	5.9e-07	50.0618
OWR44146.1	spalt protein [Danaus plexippus plexippus]	g697.t1	5.93e-07	47.7506
OWR44146.1	spalt protein [Danaus plexippus plexippus]	g26357.t1	6.01e-07	48.1358
XP_023945739.1	transient receptor potential channel pyrexia [Bicyclus anynana]	g31532.t2	6.18e-07	48.521
OWR44146.1	spalt protein [Danaus plexippus plexippus]	g27674.t1	6.21e-07	46.2098
XP_023953379.1	neurogenic locus notch homolog protein 1 isoform X1 [Bicyclus anynana]	g22931.t1	6.27e-07	49.6766
XP_026760526.1	transient receptor potential channel pyrexia isoform X1 [Galleria mellonella]	g10006.t1	6.34e-07	48.9062
OWR44146.1	spalt protein [Danaus plexippus plexippus]	g15359.t1	6.54e-07	48.9062
OWR44146.1	spalt protein [Danaus plexippus plexippus]	g30026.t1	6.56e-07	45.8246
OWR44146.1	spalt protein [Danaus plexippus plexippus]	g24352.t1	6.56e-07	45.8246
KPI94668.1	Zinc finger CCCH domain-containing protein 13 [Papilio xuthus]	g23687.t1	6.59e-07	50.0618
KPI96211.1	Zinc finger CCCH domain-containing protein 10 [Papilio xuthus]	g18696.t1	6.68e-07	48.1358
OWR44146.1	spalt protein [Danaus plexippus plexippus]	g21547.t1	6.72e-07	47.3654
OWR44146.1	spalt protein [Danaus plexippus plexippus]	g21553.t1	6.83e-07	50.447
OWR44146.1	spalt protein [Danaus plexippus plexippus]	g7501.t1	6.91e-07	50.447
KOB75729.1	Hox protein zen [Operophtera brumata]	g5598.t1	6.94e-07	46.9802
KPI94668.1	Zinc finger CCCH domain-containing protein 13 [Papilio xuthus]	g13410.t1	6.97e-07	49.6766
GBO98634.1	Ectoderm-neural cortex protein 1 [Eumeta japonica]	g2760.t1	7.14e-07	46.595
GBO98634.1	Ectoderm-neural cortex protein 1 [Eumeta japonica]	g1505.t1	7.21e-07	44.2838
GBP05223.1	Protein apterous [Eumeta japonica]	g16473.t1	7.46e-07	42.743
OWR48139.1	Multiple C2 and transmembrane domain-containing protein 2 [Danaus plexippus plexippus]	g32842.t1	7.69e-07	48.1358
OWR44146.1	spalt protein [Danaus plexippus plexippus]	g15362.t1	7.75e-07	43.8986
OWR44146.1	spalt protein [Danaus plexippus plexippus]	g20076.t1	8.11e-07	45.8246
OWR44146.1	spalt protein [Danaus plexippus plexippus]	g26444.t1	8.15e-07	47.3654
OWR44146.1	spalt protein [Danaus plexippus plexippus]	g2373.t1	8.17e-07	48.1358
AAL69325.1	distal-less [Bicyclus anynana]	g29248.t1	8.4e-07	46.9802
OWR44146.1	spalt protein [Danaus plexippus plexippus]	g26833.t1	8.57e-07	47.3654
OWR44146.1	spalt protein [Danaus plexippus plexippus]	g33776.t1	8.58e-07	47.7506
XP_013191220.1	PREDICTED: protein naked cuticle homolog [Amyelois transitella]	g30359.t1	8.6e-07	44.2838
OWR44146.1	spalt protein [Danaus plexippus plexippus]	g3255.t1	9.34e-07	48.521
OWR44146.1	spalt protein [Danaus plexippus plexippus]	g86.t1	9.37e-07	41.5874
XP_028158264.1	neurogenic locus Notch protein isoform X7 [Ostrinia furnacalis]	g21661.t1	9.85e-07	45.8246
XP_028158264.1	neurogenic locus Notch protein isoform X7 [Ostrinia furnacalis]	g21810.t1	1.08e-06	45.0542
XP_026483662.1	homeotic protein distal-less isoform X3 [Vanessa tameamea]	g33675.t1	1.1e-06	41.9726
KPJ11429.1	Doublesex- and mab-3-related transcription factor A2 [Papilio machaon]	g35675.t1	1.16e-06	45.0542
OWR44146.1	spalt protein [Danaus plexippus plexippus]	g24374.t1	1.25e-06	47.7506
OWR44146.1	spalt protein [Danaus plexippus plexippus]	g20193.t1	1.25e-06	45.0542
XP_011569112.1	PREDICTED: neurogenic locus Notch protein [Plutella xylostella]	g27728.t1	1.28e-06	44.669
GBP56046.1	Protein Optix [Eumeta japonica]	g26249.t1	1.33e-06	43.8986
OWR44146.1	spalt protein [Danaus plexippus plexippus]	g24372.t1	1.39e-06	47.7506
OWR44146.1	spalt protein [Danaus plexippus plexippus]	g7502.t1	1.4e-06	47.7506
GBO98634.1	Ectoderm-neural cortex protein 1 [Eumeta japonica]	g2658.t1	1.43e-06	45.4394
OWR46390.1	Phosphatidylinositol-4-phosphate 3-kinase C2 domain-containing beta polypeptide [Danaus plexippus plexippus]	g35601.t1	1.48e-06	46.2098
XP_026764389.1	neurogenic locus Notch protein isoform X2 [Galleria mellonella]	g7641.t1	1.52e-06	46.2098
GBO98634.1	Ectoderm-neural cortex protein 1 [Eumeta japonica]	g21827.t1	1.53e-06	45.4394
OWR44146.1	spalt protein [Danaus plexippus plexippus]	g29285.t1	1.53e-06	47.3654
XP_013170944.1	PREDICTED: transient receptor potential channel pyrexia isoform X1 [Papilio xuthus]	g10344.t1	1.58e-06	47.7506
OWR44146.1	spalt protein [Danaus plexippus plexippus]	g30208.t1	1.58e-06	45.8246
GBO98634.1	Ectoderm-neural cortex protein 1 [Eumeta japonica]	g15184.t1	1.67e-06	46.2098
GBP73352.1	Neurogenic locus Notch protein [Eumeta japonica]	g28670.t1	1.69e-06	46.9802
OWR50480.1	apterous B alpha [Danaus plexippus plexippus]	g7242.t1	1.88e-06	46.9802
OWR46938.1	WntA signaling ligand [Danaus plexippus plexippus]	g26694.t1	1.88e-06	41.5874
XP_026493686.1	protein naked cuticle homolog [Vanessa tameamea]	g31946.t1	1.95e-06	45.0542
CBH09266.1	HM00025 [Heliconius melpomene]	g21393.t1	1.98e-06	42.743
OWR44146.1	spalt protein [Danaus plexippus plexippus]	g29129.t1	2.18e-06	43.1282
OWR44146.1	spalt protein [Danaus plexippus plexippus]	g21205.t1	2.21e-06	41.2022
AFK27932.1	Ecdysone receptor [Spodoptera litura]	g28460.t1	2.22e-06	44.2838
XP_026736064.1	homeobox protein engrailed [Trichoplusia ni]	g35484.t1	2.33e-06	42.743
OWR44146.1	spalt protein [Danaus plexippus plexippus]	g7857.t1	2.37e-06	46.595
KPJ14564.1	Neurogenic locus Notch protein [Papilio machaon]	g11189.t1	2.4e-06	47.7506
OWR44146.1	spalt protein [Danaus plexippus plexippus]	g27278.t1	2.47e-06	45.4394
OWR44146.1	spalt protein [Danaus plexippus plexippus]	g31752.t1	2.5e-06	45.4394
GBP56046.1	Protein Optix [Eumeta japonica]	g26249.t2	2.52e-06	43.8986
OWR44146.1	spalt protein [Danaus plexippus plexippus]	g34350.t1	2.57e-06	41.2022
XP_011565170.1	PREDICTED: phosphatidylinositol 4-phosphate 3-kinase C2 domain-containing subunit alpha-like [Plutella xylostella]	g8948.t1	2.61e-06	49.2914
OWR50480.1	apterous B alpha [Danaus plexippus plexippus]	g29147.t1	2.64e-06	46.595
OWR44146.1	spalt protein [Danaus plexippus plexippus]	g35899.t1	2.74e-06	39.2762
GBP56046.1	Protein Optix [Eumeta japonica]	g10365.t1	2.74e-06	45.0542
OWR44146.1	spalt protein [Danaus plexippus plexippus]	g15144.t1	2.75e-06	48.1358
OWR44146.1	spalt protein [Danaus plexippus plexippus]	g8318.t1	2.76e-06	46.595
AIB07901.1	Hox cluster protein ShxC [Pararge aegeria]	g28394.t1	2.79e-06	41.9726
XP_026324002.1	neurogenic locus Notch protein isoform X6 [Hyposmocoma kahamanoa]	g19799.t2	2.79e-06	46.595
XP_028025674.1	LOW QUALITY PROTEIN: neurogenic locus notch homolog protein 2-like [Bombyx mandarina]	g17484.t1	3.02e-06	46.595
XP_012550346.1	mothers against decapentaplegic homolog 4 isoform X2 [Bombyx mori]	g27372.t1	3.06e-06	46.2098
OWR44146.1	spalt protein [Danaus plexippus plexippus]	g8755.t1	3.43e-06	41.2022
XP_028025674.1	LOW QUALITY PROTEIN: neurogenic locus notch homolog protein 2-like [Bombyx mandarina]	g17337.t1	3.54e-06	40.0466
OWR44146.1	spalt protein [Danaus plexippus plexippus]	g22407.t1	3.54e-06	46.2098
GBP56046.1	Protein Optix [Eumeta japonica]	g10365.t2	3.6e-06	45.0542
XP_011567216.1	PREDICTED: heterodimeric geranylgeranyl pyrophosphate synthase large subunit 1, chloroplastic-like [Plutella xylostella]	g5548.t1	3.65e-06	42.743
OWR50480.1	apterous B alpha [Danaus plexippus plexippus]	g1152.t1	3.74e-06	45.4394
XP_028157770.1	ligand of Numb protein X 2-like [Ostrinia furnacalis]	g30880.t1	3.93e-06	40.817
XP_028158264.1	neurogenic locus Notch protein isoform X7 [Ostrinia furnacalis]	g34899.t1	3.96e-06	46.2098
OWR44146.1	spalt protein [Danaus plexippus plexippus]	g14276.t1	3.96e-06	47.3654
GBP73349.1	Neurogenic locus Notch protein [Eumeta japonica]	g12990.t1	4.08e-06	43.1282
XP_012550346.1	mothers against decapentaplegic homolog 4 isoform X2 [Bombyx mori]	g27372.t2	4.18e-06	46.2098
AIB07879.1	Hox cluster protein ShxA [Cameraria ohridella]	g21407.t1	4.31e-06	45.8246
OWR44146.1	spalt protein [Danaus plexippus plexippus]	g24832.t1	4.33e-06	45.4394
OWR43715.1	Zinc finger CCCH domain-containing protein 10 [Danaus plexippus plexippus]	g16753.t1	4.46e-06	43.1282
XP_028025674.1	LOW QUALITY PROTEIN: neurogenic locus notch homolog protein 2-like [Bombyx mandarina]	g31316.t1	4.46e-06	38.891
XP_011560104.1	PREDICTED: mothers against decapentaplegic homolog 4 isoform X1 [Plutella xylostella]	g19584.t1	4.47e-06	45.0542
KPI96211.1	Zinc finger CCCH domain-containing protein 10 [Papilio xuthus]	g8060.t1	4.48e-06	45.0542
OWR44146.1	spalt protein [Danaus plexippus plexippus]	g26602.t1	4.54e-06	40.4318
OWR44146.1	spalt protein [Danaus plexippus plexippus]	g19359.t1	4.59e-06	43.5134
OWR44146.1	spalt protein [Danaus plexippus plexippus]	g7032.t1	4.62e-06	45.8246
GBP73352.1	Neurogenic locus Notch protein [Eumeta japonica]	g8444.t1	4.69e-06	45.8246
OWR44146.1	spalt protein [Danaus plexippus plexippus]	g3468.t1	4.73e-06	44.669
OWR44146.1	spalt protein [Danaus plexippus plexippus]	g20194.t1	4.78e-06	40.817
OWR44146.1	spalt protein [Danaus plexippus plexippus]	g27993.t1	5.02e-06	46.2098
OWR44146.1	spalt protein [Danaus plexippus plexippus]	g9691.t1	5.28e-06	42.3578
OWR44146.1	spalt protein [Danaus plexippus plexippus]	g36110.t1	5.29e-06	42.743
GBO98634.1	Ectoderm-neural cortex protein 1 [Eumeta japonica]	g18052.t1	5.4e-06	44.669
GBO98634.1	Ectoderm-neural cortex protein 1 [Eumeta japonica]	g35704.t1	5.4e-06	44.669
GBO98634.1	Ectoderm-neural cortex protein 1 [Eumeta japonica]	g20621.t1	5.53e-06	45.4394
OWR44146.1	spalt protein [Danaus plexippus plexippus]	g6504.t1	5.57e-06	44.669
GBP04056.1	Transient receptor potential channel pyrexia [Eumeta japonica]	g31272.t1	5.59e-06	44.669
OWR44146.1	spalt protein [Danaus plexippus plexippus]	g16969.t1	6.04e-06	43.5134
OWR44146.1	spalt protein [Danaus plexippus plexippus]	g16986.t1	6.04e-06	43.5134
OWR44146.1	spalt protein [Danaus plexippus plexippus]	g31711.t1	6.19e-06	45.4394
OWR44146.1	spalt protein [Danaus plexippus plexippus]	g32027.t1	6.27e-06	42.3578
XP_021200572.1	calcium-activated potassium channel slowpoke isoform X5 [Helicoverpa armigera]	g14088.t1	6.29e-06	44.2838
OWR44146.1	spalt protein [Danaus plexippus plexippus]	g4794.t1	6.39e-06	45.8246
AIB07901.1	Hox cluster protein ShxC [Pararge aegeria]	g19224.t1	6.46e-06	41.5874
OWR44146.1	spalt protein [Danaus plexippus plexippus]	g4794.t2	6.79e-06	45.8246
BAH83638.1	Notch [Bombyx mori]	g6198.t1	6.83e-06	45.0542
OWR44146.1	spalt protein [Danaus plexippus plexippus]	g18012.t1	6.86e-06	43.1282
XP_026314823.1	neurogenic locus notch homolog protein 3-like isoform X1 [Hyposmocoma kahamanoa]	g16413.t1	6.97e-06	41.5874
XP_011569112.1	PREDICTED: neurogenic locus Notch protein [Plutella xylostella]	g5376.t1	7.01e-06	43.8986
OWR44146.1	spalt protein [Danaus plexippus plexippus]	g5563.t1	7.02e-06	38.1206
AFK27932.1	Ecdysone receptor [Spodoptera litura]	g22358.t1	7.06e-06	41.2022
BAK19078.1	apterous B beta [Bombyx mori]	g11617.t1	7.08e-06	40.817
KPI94668.1	Zinc finger CCCH domain-containing protein 13 [Papilio xuthus]	g21556.t1	7.1e-06	43.5134
OWR44146.1	spalt protein [Danaus plexippus plexippus]	g7657.t1	7.53e-06	44.2838
OWR44146.1	spalt protein [Danaus plexippus plexippus]	g28963.t1	7.64e-06	45.0542
KOB75729.1	Hox protein zen [Operophtera brumata]	g6705.t1	7.72e-06	41.2022
OWR44146.1	spalt protein [Danaus plexippus plexippus]	g7637.t1	7.94e-06	45.0542
GBO98634.1	Ectoderm-neural cortex protein 1 [Eumeta japonica]	g9102.t1	8.05e-06	44.2838
XP_013191220.1	PREDICTED: protein naked cuticle homolog [Amyelois transitella]	g25126.t1	8.46e-06	41.5874
GBO98634.1	Ectoderm-neural cortex protein 1 [Eumeta japonica]	g17180.t1	9e-06	43.5134
GBP73349.1	Neurogenic locus Notch protein [Eumeta japonica]	g24450.t1	9.04e-06	44.2838
KPJ12285.1	Zinc finger CCCH domain-containing protein 13 [Papilio machaon]	g32535.t1	9.39e-06	46.9802
GBO98634.1	Ectoderm-neural cortex protein 1 [Eumeta japonica]	g33938.t1	9.46e-06	43.1282
KPI96640.1	Segmentation polarity homeobox protein engrailed [Papilio xuthus]	g10471.t1	9.66e-06	39.6614
XP_026314823.1	neurogenic locus notch homolog protein 3-like isoform X1 [Hyposmocoma kahamanoa]	g13472.t1	1.01e-05	39.2762
OWR44146.1	spalt protein [Danaus plexippus plexippus]	g19363.t1	1.05e-05	44.669
XP_028172532.1	protein spaetzle 5 [Ostrinia furnacalis]	g13956.t1	1.09e-05	41.5874
KPJ09094.1	Protein apterous [Papilio machaon]	g29397.t1	1.1e-05	38.891
XP_011554413.1	PREDICTED: transient receptor potential channel pyrexia [Plutella xylostella]	g16886.t1	1.13e-05	42.3578
KOB67879.1	Transient receptor potential channel pyrexia [Operophtera brumata]	g17806.t1	1.13e-05	43.1282
OWR44146.1	spalt protein [Danaus plexippus plexippus]	g20599.t1	1.14e-05	37.7354
KPJ12285.1	Zinc finger CCCH domain-containing protein 13 [Papilio machaon]	g24891.t1	1.14e-05	45.4394
OWR44146.1	spalt protein [Danaus plexippus plexippus]	g34238.t1	1.16e-05	36.5798
XP_023946720.1	neurogenic locus Notch protein isoform X2 [Bicyclus anynana]	g32371.t2	1.16e-05	44.669
OWR44146.1	spalt protein [Danaus plexippus plexippus]	g6608.t1	1.16e-05	39.2762
OWR47439.1	putative C3 and PZP alpha-2-macroglobulin domain-containing protein 8 [Danaus plexippus plexippus]	g14712.t1	1.17e-05	46.595
OWR44146.1	spalt protein [Danaus plexippus plexippus]	g9753.t1	1.2e-05	45.4394
GBP56046.1	Protein Optix [Eumeta japonica]	g6258.t1	1.2e-05	40.4318
AFK27932.1	Ecdysone receptor [Spodoptera litura]	g4632.t1	1.22e-05	39.6614
OWR44146.1	spalt protein [Danaus plexippus plexippus]	g6501.t1	1.23e-05	43.5134
GBP73349.1	Neurogenic locus Notch protein [Eumeta japonica]	g24439.t1	1.25e-05	44.2838
XP_026314824.1	neurogenic locus notch homolog protein 3-like isoform X2 [Hyposmocoma kahamanoa]	g24430.t1	1.25e-05	45.0542
XP_023953379.1	neurogenic locus notch homolog protein 1 isoform X1 [Bicyclus anynana]	g22624.t1	1.27e-05	40.817
KOB66732.1	Hox cluster protein ShxA [Operophtera brumata]	g6937.t1	1.31e-05	40.4318
OWR44146.1	spalt protein [Danaus plexippus plexippus]	g12611.t1	1.33e-05	44.2838
GBO98634.1	Ectoderm-neural cortex protein 1 [Eumeta japonica]	g11645.t1	1.42e-05	42.3578
XP_026324002.1	neurogenic locus Notch protein isoform X6 [Hyposmocoma kahamanoa]	g19799.t1	1.42e-05	44.2838
OWR44146.1	spalt protein [Danaus plexippus plexippus]	g7638.t1	1.47e-05	43.8986
GBO98634.1	Ectoderm-neural cortex protein 1 [Eumeta japonica]	g19741.t1	1.47e-05	42.743
OWR44146.1	spalt protein [Danaus plexippus plexippus]	g22860.t1	1.48e-05	45.0542
XP_022125910.1	neurogenic locus Notch protein isoform X1 [Pieris rapae]	g32371.t1	1.48e-05	44.2838
OWR44146.1	spalt protein [Danaus plexippus plexippus]	g6499.t1	1.5e-05	43.1282
KPJ12285.1	Zinc finger CCCH domain-containing protein 13 [Papilio machaon]	g19636.t1	1.53e-05	42.743
XP_028025674.1	LOW QUALITY PROTEIN: neurogenic locus notch homolog protein 2-like [Bombyx mandarina]	g9334.t1	1.54e-05	43.8986
XP_021207079.1	mothers against decapentaplegic homolog 4 isoform X3 [Bombyx mori]	g34091.t1	1.56e-05	37.7354
BAK19077.1	apterous B alpha [Bombyx mori]	g25355.t1	1.56e-05	44.2838
BAK19081.1	apterous A splicing isoform type D [Bombyx mori]	g5557.t1	1.56e-05	40.0466
XP_013177440.1	PREDICTED: protein naked cuticle homolog [Papilio xuthus]	g5369.t1	1.58e-05	40.817
XP_013177440.1	PREDICTED: protein naked cuticle homolog [Papilio xuthus]	g29935.t1	1.58e-05	40.817
OWR43715.1	Zinc finger CCCH domain-containing protein 10 [Danaus plexippus plexippus]	g3050.t1	1.61e-05	43.1282
OWR44146.1	spalt protein [Danaus plexippus plexippus]	g7638.t2	1.64e-05	43.8986
KPJ12285.1	Zinc finger CCCH domain-containing protein 13 [Papilio machaon]	g27843.t1	1.68e-05	43.8986
pdb|4UMM|E	Chain E, ECDYSONE RECEPTOR	g15454.t1	1.69e-05	39.6614
KPI94668.1	Zinc finger CCCH domain-containing protein 13 [Papilio xuthus]	g18287.t1	1.71e-05	43.8986
KPJ16192.1	Protein Optix [Papilio machaon]	g8378.t1	1.71e-05	40.817
XP_023934688.1	calcium-activated potassium channel slowpoke isoform X3 [Bicyclus anynana]	g17956.t1	1.72e-05	42.743
GBO98634.1	Ectoderm-neural cortex protein 1 [Eumeta japonica]	g10355.t1	1.78e-05	41.9726
XP_014359206.1	PREDICTED: LOW QUALITY PROTEIN: neurogenic locus Notch protein-like [Papilio machaon]	g7648.t1	1.8e-05	41.5874
XP_011569112.1	PREDICTED: neurogenic locus Notch protein [Plutella xylostella]	g17534.t1	1.84e-05	45.0542
BAK19080.1	apterous A splicing isoform type C [Bombyx mori]	g36087.t1	1.93e-05	40.4318
XP_026332169.1	mothers against decapentaplegic homolog 4 [Hyposmocoma kahamanoa]	g671.t1	1.94e-05	45.4394
OWR50480.1	apterous B alpha [Danaus plexippus plexippus]	g11684.t1	1.94e-05	39.6614
OWR44146.1	spalt protein [Danaus plexippus plexippus]	g2311.t1	1.97e-05	46.2098
AFK27932.1	Ecdysone receptor [Spodoptera litura]	g31470.t1	2.02e-05	42.3578
OWR44146.1	spalt protein [Danaus plexippus plexippus]	g4334.t1	2.05e-05	40.0466
AFK27932.1	Ecdysone receptor [Spodoptera litura]	g4729.t1	2.07e-05	42.3578
OWR44146.1	spalt protein [Danaus plexippus plexippus]	g9398.t1	2.17e-05	41.2022
KPI94668.1	Zinc finger CCCH domain-containing protein 13 [Papilio xuthus]	g17853.t1	2.17e-05	43.5134
AFK27932.1	Ecdysone receptor [Spodoptera litura]	g24729.t1	2.21e-05	40.0466
XP_022118100.1	calcium-activated potassium channel slowpoke isoform X4 [Pieris rapae]	g5131.t1	2.28e-05	42.3578
OWR46938.1	WntA signaling ligand [Danaus plexippus plexippus]	g20680.t1	2.29e-05	41.5874
XP_028157770.1	ligand of Numb protein X 2-like [Ostrinia furnacalis]	g21091.t1	2.31e-05	38.1206
XP_026332169.1	mothers against decapentaplegic homolog 4 [Hyposmocoma kahamanoa]	g688.t1	2.33e-05	43.5134
KPI96211.1	Zinc finger CCCH domain-containing protein 10 [Papilio xuthus]	g17062.t1	2.35e-05	43.5134
OWR44146.1	spalt protein [Danaus plexippus plexippus]	g27998.t1	2.35e-05	37.7354
OWR44146.1	spalt protein [Danaus plexippus plexippus]	g13619.t1	2.36e-05	43.5134
XP_013144227.1	PREDICTED: neurogenic locus Notch protein [Papilio polytes]	g15810.t1	2.38e-05	44.2838
XP_026313578.1	protein strawberry notch [Hyposmocoma kahamanoa]	g574.t1	2.42e-05	41.5874
KPJ16192.1	Protein Optix [Papilio machaon]	g35500.t1	2.51e-05	41.2022
AAT44358.1	calcium-activated potassium channel alpha subunit [Manduca sexta]	g5409.t1	2.51e-05	41.9726
XP_013166846.1	PREDICTED: neurogenic locus Notch protein [Papilio xuthus]	g4399.t1	2.51e-05	41.2022
OWR44146.1	spalt protein [Danaus plexippus plexippus]	g19545.t1	2.55e-05	43.5134
OWR44146.1	spalt protein [Danaus plexippus plexippus]	g27997.t1	2.55e-05	43.1282
OWR44146.1	spalt protein [Danaus plexippus plexippus]	g8750.t1	2.62e-05	42.743
XP_028159697.1	calcium-activated potassium channel slowpoke isoform X16 [Ostrinia furnacalis]	g9202.t1	2.7e-05	41.9726
KPJ14564.1	Neurogenic locus Notch protein [Papilio machaon]	g10606.t1	2.81e-05	41.5874
OWR44146.1	spalt protein [Danaus plexippus plexippus]	g8145.t1	2.82e-05	45.4394
KPJ16192.1	Protein Optix [Papilio machaon]	g4223.t1	2.82e-05	40.817
GBP59257.1	Transient receptor potential channel pyrexia [Eumeta japonica]	g28159.t1	2.92e-05	38.1206
BAK19082.1	apterous A splicing isoform type E [Bombyx mori]	g5523.t1	2.97e-05	36.965
XP_011554413.1	PREDICTED: transient receptor potential channel pyrexia [Plutella xylostella]	g11409.t1	3e-05	39.2762
OWR44146.1	spalt protein [Danaus plexippus plexippus]	g31512.t1	3.09e-05	42.743
OWR44146.1	spalt protein [Danaus plexippus plexippus]	g7507.t1	3.13e-05	41.9726
XP_022837346.1	multiple C2 and transmembrane domain-containing protein isoform X2 [Spodoptera litura]	g29991.t1	3.17e-05	36.5798
DAA64848.1	TPA_inf: Hox cluster protein Shx10 [Bombyx mori]	g19000.t1	3.2e-05	42.3578
XP_014367321.1	PREDICTED: calcium-activated potassium channel slowpoke isoform X2 [Papilio machaon]	g27396.t1	3.22e-05	43.5134
GBO98634.1	Ectoderm-neural cortex protein 1 [Eumeta japonica]	g744.t1	3.22e-05	39.6614
OWR44146.1	spalt protein [Danaus plexippus plexippus]	g6500.t1	3.34e-05	42.3578
XP_021192145.1	doublesex- and mab-3-related transcription factor B1-like [Helicoverpa armigera]	g11063.t1	3.37e-05	40.4318
OWR44146.1	spalt protein [Danaus plexippus plexippus]	g19145.t1	3.39e-05	41.5874
OWR44146.1	spalt protein [Danaus plexippus plexippus]	g323.t1	3.42e-05	41.5874
OWR44146.1	spalt protein [Danaus plexippus plexippus]	g11778.t1	3.64e-05	43.1282
XP_022116821.1	mothers against decapentaplegic homolog 4 isoform X1 [Pieris rapae]	g1089.t1	3.67e-05	45.8246
XP_028157770.1	ligand of Numb protein X 2-like [Ostrinia furnacalis]	g8373.t1	3.71e-05	39.6614
GBP20649.1	Neurogenic locus notch homolog protein 1 [Eumeta japonica]	g33464.t1	3.73e-05	42.3578
XP_026314824.1	neurogenic locus notch homolog protein 3-like isoform X2 [Hyposmocoma kahamanoa]	g10098.t1	3.74e-05	35.8094
OWR44146.1	spalt protein [Danaus plexippus plexippus]	g21277.t1	3.94e-05	41.9726
GBP33478.1	Protein numb [Eumeta japonica]	g26037.t1	4e-05	42.3578
OWR44146.1	spalt protein [Danaus plexippus plexippus]	g27042.t1	4.18e-05	41.9726
AFK27932.1	Ecdysone receptor [Spodoptera litura]	g34354.t1	4.2e-05	41.9726
XP_028157770.1	ligand of Numb protein X 2-like [Ostrinia furnacalis]	g8373.t2	4.48e-05	39.2762
GBP59257.1	Transient receptor potential channel pyrexia [Eumeta japonica]	g4159.t1	4.52e-05	35.8094
OWR44146.1	spalt protein [Danaus plexippus plexippus]	g26358.t1	4.64e-05	41.5874
XP_028157770.1	ligand of Numb protein X 2-like [Ostrinia furnacalis]	g8373.t3	4.75e-05	39.2762
OWR44146.1	spalt protein [Danaus plexippus plexippus]	g6627.t1	4.78e-05	41.9726
XP_026494186.1	transient receptor potential channel pyrexia [Vanessa tameamea]	g30956.t1	4.81e-05	43.5134
XP_014371481.1	PREDICTED: mothers against decapentaplegic homolog 4 isoform X2 [Papilio machaon]	g2148.t1	4.99e-05	37.7354
GBO98634.1	Ectoderm-neural cortex protein 1 [Eumeta japonica]	g14944.t1	5.24e-05	39.6614
OWR44146.1	spalt protein [Danaus plexippus plexippus]	g18789.t1	5.25e-05	41.5874
XP_026494186.1	transient receptor potential channel pyrexia [Vanessa tameamea]	g25411.t1	5.36e-05	43.8986
OWR48140.1	Multiple C2 and transmembrane domain-containing protein 2 [Danaus plexippus plexippus]	g13104.t2	5.42e-05	41.9726
KPJ09176.1	Zinc finger CCCH domain-containing protein 10 [Papilio machaon]	g25379.t1	5.57e-05	41.5874
OWR44146.1	spalt protein [Danaus plexippus plexippus]	g27042.t2	5.69e-05	41.9726
OWR44146.1	spalt protein [Danaus plexippus plexippus]	g34332.t1	5.76e-05	39.6614
OWR48140.1	Multiple C2 and transmembrane domain-containing protein 2 [Danaus plexippus plexippus]	g13104.t1	5.82e-05	41.9726
XP_014363303.1	PREDICTED: protein numb [Papilio machaon]	g30829.t1	5.97e-05	37.3502
KPI94668.1	Zinc finger CCCH domain-containing protein 13 [Papilio xuthus]	g10363.t1	6.1e-05	41.2022
OWR44146.1	spalt protein [Danaus plexippus plexippus]	g22726.t1	6.21e-05	40.817
OWR44146.1	spalt protein [Danaus plexippus plexippus]	g35665.t1	6.21e-05	38.1206
GBO98634.1	Ectoderm-neural cortex protein 1 [Eumeta japonica]	g16142.t1	6.32e-05	40.817
OWR48140.1	Multiple C2 and transmembrane domain-containing protein 2 [Danaus plexippus plexippus]	g13104.t3	6.52e-05	42.3578
KPJ08921.1	Transient receptor potential channel pyrexia [Papilio machaon]	g25854.t1	6.55e-05	38.5058
AAT44358.1	calcium-activated potassium channel alpha subunit [Manduca sexta]	g4837.t1	6.59e-05	41.5874
OWR44146.1	spalt protein [Danaus plexippus plexippus]	g10648.t1	6.62e-05	41.9726
KPI94668.1	Zinc finger CCCH domain-containing protein 13 [Papilio xuthus]	g12049.t1	6.65e-05	41.9726
XP_011564306.1	PREDICTED: ecdysone receptor [Plutella xylostella]	g32505.t1	6.89e-05	40.0466
OWR44146.1	spalt protein [Danaus plexippus plexippus]	g12611.t2	6.97e-05	41.9726
XP_011569112.1	PREDICTED: neurogenic locus Notch protein [Plutella xylostella]	g22159.t1	7.04e-05	41.9726
OWR44146.1	spalt protein [Danaus plexippus plexippus]	g14607.t1	7.06e-05	42.3578
XP_021207942.1	apterous A isoform X2 [Bombyx mori]	g1149.t1	7.2e-05	38.1206
XP_026735244.1	transient receptor potential channel pyrexia [Trichoplusia ni]	g15673.t1	7.31e-05	41.2022
KPJ08921.1	Transient receptor potential channel pyrexia [Papilio machaon]	g29421.t1	7.38e-05	36.965
OWR44146.1	spalt protein [Danaus plexippus plexippus]	g23555.t1	7.52e-05	41.2022
XP_012545814.1	transient receptor potential channel pyrexia isoform X2 [Bombyx mori]	g32254.t1	7.68e-05	42.3578
OWR44146.1	spalt protein [Danaus plexippus plexippus]	g21875.t1	7.85e-05	40.817
XP_026332169.1	mothers against decapentaplegic homolog 4 [Hyposmocoma kahamanoa]	g20931.t1	7.91e-05	41.9726
XP_026764390.1	neurogenic locus Notch protein isoform X3 [Galleria mellonella]	g32890.t1	7.97e-05	41.9726
GBP04056.1	Transient receptor potential channel pyrexia [Eumeta japonica]	g21113.t1	8e-05	38.891
XP_026315092.1	transient receptor potential channel pyrexia [Hyposmocoma kahamanoa]	g2355.t1	8.04e-05	42.3578
OWR44146.1	spalt protein [Danaus plexippus plexippus]	g24109.t1	8.21e-05	40.4318
OWR44146.1	spalt protein [Danaus plexippus plexippus]	g24109.t2	8.21e-05	40.4318
OWR44146.1	spalt protein [Danaus plexippus plexippus]	g21576.t1	8.26e-05	40.817
OWR44146.1	spalt protein [Danaus plexippus plexippus]	g21575.t1	8.37e-05	38.1206
GBP73349.1	Neurogenic locus Notch protein [Eumeta japonica]	g2184.t1	8.47e-05	45.0542
XP_028157770.1	ligand of Numb protein X 2-like [Ostrinia furnacalis]	g20613.t1	8.58e-05	38.1206
XP_013186206.1	PREDICTED: mothers against decapentaplegic homolog 4 isoform X3 [Amyelois transitella]	g30.t1	8.6e-05	42.3578
OWR44146.1	spalt protein [Danaus plexippus plexippus]	g10615.t1	8.72e-05	38.5058
OWR44146.1	spalt protein [Danaus plexippus plexippus]	g10333.t1	8.76e-05	42.3578
GBP04056.1	Transient receptor potential channel pyrexia [Eumeta japonica]	g21113.t2	9.05e-05	39.2762
XP_022817517.1	transient receptor potential channel pyrexia isoform X2 [Spodoptera litura]	g11696.t1	9.1e-05	35.8094
AEP43793.2	black [Biston betularia]	g34460.t1	9.16e-05	38.1206
GBP33478.1	Protein numb [Eumeta japonica]	g27126.t1	9.17e-05	41.5874
GBP05223.1	Protein apterous [Eumeta japonica]	g25298.t1	9.19e-05	40.0466
OWR44146.1	spalt protein [Danaus plexippus plexippus]	g12612.t1	9.34e-05	41.9726
KPJ08921.1	Transient receptor potential channel pyrexia [Papilio machaon]	g24957.t1	9.43e-05	36.5798
OWR44146.1	spalt protein [Danaus plexippus plexippus]	g8137.t1	9.5e-05	42.743
XP_022116822.1	mothers against decapentaplegic homolog 4 isoform X2 [Pieris rapae]	g10356.t1	9.65e-05	42.3578
XP_026315092.1	transient receptor potential channel pyrexia [Hyposmocoma kahamanoa]	g15673.t2	9.69e-05	41.5874
OWR44146.1	spalt protein [Danaus plexippus plexippus]	g26446.t1	9.79e-05	41.9726
OWR44146.1	spalt protein [Danaus plexippus plexippus]	g35073.t1	9.96e-05	42.3578
OWR44146.1	spalt protein [Danaus plexippus plexippus]	g18570.t1	0.0001	40.0466
XP_026314823.1	neurogenic locus notch homolog protein 3-like isoform X1 [Hyposmocoma kahamanoa]	g13082.t1	0.000104	38.891
XP_028158264.1	neurogenic locus Notch protein isoform X7 [Ostrinia furnacalis]	g26123.t1	0.000105	41.2022
GBO98634.1	Ectoderm-neural cortex protein 1 [Eumeta japonica]	g30520.t1	0.000105	41.2022
XP_026314823.1	neurogenic locus notch homolog protein 3-like isoform X1 [Hyposmocoma kahamanoa]	g18949.t1	0.000105	37.3502
KPI94668.1	Zinc finger CCCH domain-containing protein 13 [Papilio xuthus]	g32535.t2	0.000105	43.5134
OWR44146.1	spalt protein [Danaus plexippus plexippus]	g13236.t1	0.000106	41.2022
XP_026733734.1	zinc finger CCCH domain-containing protein 15 homolog [Trichoplusia ni]	g25647.t1	0.000108	42.3578
XP_011569112.1	PREDICTED: neurogenic locus Notch protein [Plutella xylostella]	g32672.t1	0.000109	41.5874
XP_026733734.1	zinc finger CCCH domain-containing protein 15 homolog [Trichoplusia ni]	g34806.t1	0.000111	42.3578
KPI96211.1	Zinc finger CCCH domain-containing protein 10 [Papilio xuthus]	g35055.t1	0.000112	39.2762
OWR46390.1	Phosphatidylinositol-4-phosphate 3-kinase C2 domain-containing beta polypeptide [Danaus plexippus plexippus]	g16922.t1	0.000113	41.2022
XP_013135767.1	PREDICTED: transient receptor potential channel pyrexia isoform X2 [Papilio polytes]	g3674.t1	0.000113	37.3502
GBP33478.1	Protein numb [Eumeta japonica]	g661.t1	0.000116	41.5874
XP_013191220.1	PREDICTED: protein naked cuticle homolog [Amyelois transitella]	g9829.t1	0.000117	38.5058
XP_022116821.1	mothers against decapentaplegic homolog 4 isoform X1 [Pieris rapae]	g33438.t1	0.000123	43.1282
OWR44146.1	spalt protein [Danaus plexippus plexippus]	g7929.t1	0.000128	41.2022
OWR44146.1	spalt protein [Danaus plexippus plexippus]	g21873.t1	0.000129	39.6614
OWR44146.1	spalt protein [Danaus plexippus plexippus]	g29810.t1	0.00013	40.817
OWR44146.1	spalt protein [Danaus plexippus plexippus]	g20507.t1	0.00013	39.2762
OWR44146.1	spalt protein [Danaus plexippus plexippus]	g20611.t2	0.000133	39.6614
OWR44146.1	spalt protein [Danaus plexippus plexippus]	g12842.t1	0.000133	41.2022
OWR44146.1	spalt protein [Danaus plexippus plexippus]	g884.t1	0.000136	41.5874
OWR44146.1	spalt protein [Danaus plexippus plexippus]	g20611.t1	0.000137	39.2762
XP_028157770.1	ligand of Numb protein X 2-like [Ostrinia furnacalis]	g14475.t1	0.000138	36.1946
OWR44146.1	spalt protein [Danaus plexippus plexippus]	g27688.t1	0.00014	40.817
XP_023953379.1	neurogenic locus notch homolog protein 1 isoform X1 [Bicyclus anynana]	g35750.t1	0.00014	36.965
XP_013191220.1	PREDICTED: protein naked cuticle homolog [Amyelois transitella]	g16167.t1	0.000144	37.3502
OWR44146.1	spalt protein [Danaus plexippus plexippus]	g10191.t1	0.000144	38.891
GBP00197.1	Neurogenic locus Notch protein [Eumeta japonica]	g4536.t1	0.000148	38.891
XP_014367234.1	PREDICTED: geranylgeranyl pyrophosphate synthase [Papilio machaon]	g3247.t1	0.00015	37.7354
OWR44146.1	spalt protein [Danaus plexippus plexippus]	g9752.t1	0.000156	39.6614
XP_014372144.1	PREDICTED: transient receptor potential channel pyrexia [Papilio machaon]	g32519.t1	0.000156	36.1946
OWR44146.1	spalt protein [Danaus plexippus plexippus]	g21798.t1	0.000156	37.7354
AFK27932.1	Ecdysone receptor [Spodoptera litura]	g32545.t1	0.000156	42.743
GBP73349.1	Neurogenic locus Notch protein [Eumeta japonica]	g18923.t1	0.000157	43.5134
OWR44146.1	spalt protein [Danaus plexippus plexippus]	g10189.t1	0.000157	35.4242
XP_022816959.1	homeotic protein distal-less [Spodoptera litura]	g2689.t1	0.000161	41.2022
XP_028157770.1	ligand of Numb protein X 2-like [Ostrinia furnacalis]	g2272.t1	0.000163	35.039
OWR44146.1	spalt protein [Danaus plexippus plexippus]	g518.t1	0.000163	40.0466
XP_004921982.1	protein cortex isoform X2 [Bombyx mori]	g14339.t1	0.000168	39.2762
XP_026764390.1	neurogenic locus Notch protein isoform X3 [Galleria mellonella]	g32225.t1	0.000171	42.743
GBO99612.1	Mothers against decapentaplegic homolog 4 [Eumeta japonica]	g33441.t1	0.000177	37.3502
XP_028036666.1	transient receptor potential channel pyrexia [Bombyx mandarina]	g6112.t1	0.000178	39.6614
XP_028158264.1	neurogenic locus Notch protein isoform X7 [Ostrinia furnacalis]	g19419.t1	0.000181	36.5798
OWR44146.1	spalt protein [Danaus plexippus plexippus]	g10019.t1	0.000182	41.2022
XP_026324000.1	neurogenic locus Notch protein isoform X4 [Hyposmocoma kahamanoa]	g5223.t1	0.000182	37.3502
XP_028036666.1	transient receptor potential channel pyrexia [Bombyx mandarina]	g6878.t1	0.000191	42.743
OWR44146.1	spalt protein [Danaus plexippus plexippus]	g30955.t1	0.000193	38.5058
OWR47439.1	putative C3 and PZP alpha-2-macroglobulin domain-containing protein 8 [Danaus plexippus plexippus]	g17965.t1	0.000194	41.5874
OWR50480.1	apterous B alpha [Danaus plexippus plexippus]	g26814.t1	0.000197	39.6614
OWR44146.1	spalt protein [Danaus plexippus plexippus]	g20495.t1	0.000197	37.3502
GBO98634.1	Ectoderm-neural cortex protein 1 [Eumeta japonica]	g11952.t1	0.000199	40.4318
XP_014359206.1	PREDICTED: LOW QUALITY PROTEIN: neurogenic locus Notch protein-like [Papilio machaon]	g7999.t1	0.000201	41.9726
XP_014372144.1	PREDICTED: transient receptor potential channel pyrexia [Papilio machaon]	g19959.t1	0.000201	40.4318
OWR44146.1	spalt protein [Danaus plexippus plexippus]	g6502.t1	0.000205	39.6614
XP_022819207.1	neurogenic locus Notch protein isoform X4 [Spodoptera litura]	g28162.t1	0.000205	40.817
XP_014359206.1	PREDICTED: LOW QUALITY PROTEIN: neurogenic locus Notch protein-like [Papilio machaon]	g7999.t2	0.000207	41.9726
OWR44146.1	spalt protein [Danaus plexippus plexippus]	g7010.t1	0.00021	41.9726
XP_012545814.1	transient receptor potential channel pyrexia isoform X2 [Bombyx mori]	g32238.t1	0.000211	42.3578
GBP65214.1	Transient receptor potential channel pyrexia [Eumeta japonica]	g10502.t1	0.000219	35.4242
OWR44146.1	spalt protein [Danaus plexippus plexippus]	g20611.t3	0.000233	38.891
GBP56046.1	Protein Optix [Eumeta japonica]	g10915.t1	0.000233	39.2762
OWR44146.1	spalt protein [Danaus plexippus plexippus]	g5262.t1	0.000241	35.039
XP_022112667.1	ecdysone receptor isoform X3 [Pieris rapae]	g4793.t1	0.000247	40.0466
XP_013183510.1	PREDICTED: homeotic protein distal-less [Amyelois transitella]	g18999.t1	0.000255	37.3502
XP_023935201.1	transient receptor potential channel pyrexia [Bicyclus anynana]	g30555.t1	0.000261	35.4242
XP_026489183.1	neurogenic locus notch homolog protein 4 [Vanessa tameamea]	g30573.t1	0.000261	40.0466
XP_022118108.1	calcium-activated potassium channel slowpoke isoform X12 [Pieris rapae]	g2428.t1	0.000279	40.0466
OWR44146.1	spalt protein [Danaus plexippus plexippus]	g4439.t1	0.000281	39.2762
OWR44146.1	spalt protein [Danaus plexippus plexippus]	g18801.t1	0.000291	34.6538
OWR44146.1	spalt protein [Danaus plexippus plexippus]	g11644.t1	0.000297	34.6538
OWR44146.1	spalt protein [Danaus plexippus plexippus]	g7116.t1	0.000297	34.6538
GBP33478.1	Protein numb [Eumeta japonica]	g7669.t1	0.000303	40.4318
XP_021206939.1	calcium-activated potassium channel slowpoke isoform X1 [Bombyx mori]	g28913.t1	0.000307	39.2762
XP_028033153.1	geranylgeranyl pyrophosphate synthase [Bombyx mandarina]	g9709.t1	0.000309	35.4242
XP_028157770.1	ligand of Numb protein X 2-like [Ostrinia furnacalis]	g9228.t1	0.000311	36.1946
XP_011567216.1	PREDICTED: heterodimeric geranylgeranyl pyrophosphate synthase large subunit 1, chloroplastic-like [Plutella xylostella]	g23786.t1	0.000324	36.965
XP_013165317.1	PREDICTED: neurogenic locus notch homolog protein 3-like [Papilio xuthus]	g30817.t1	0.000325	38.1206
OWR44146.1	spalt protein [Danaus plexippus plexippus]	g25573.t1	0.000326	36.5798
OWR47439.1	putative C3 and PZP alpha-2-macroglobulin domain-containing protein 8 [Danaus plexippus plexippus]	g18928.t1	0.000329	40.817
XP_022112667.1	ecdysone receptor isoform X3 [Pieris rapae]	g27000.t1	0.000338	40.4318
GBP73352.1	Neurogenic locus Notch protein [Eumeta japonica]	g28627.t1	0.00034	33.8834
OWR44146.1	spalt protein [Danaus plexippus plexippus]	g5791.t1	0.000347	39.2762
XP_023934015.1	protein cortex isoform X2 [Bicyclus anynana]	g8852.t1	0.000347	39.6614
OWR44146.1	spalt protein [Danaus plexippus plexippus]	g4179.t1	0.000348	34.6538
GBO98634.1	Ectoderm-neural cortex protein 1 [Eumeta japonica]	g14943.t1	0.000355	35.039
GBO98634.1	Ectoderm-neural cortex protein 1 [Eumeta japonica]	g13946.t1	0.000358	38.891
AFK27932.1	Ecdysone receptor [Spodoptera litura]	g26132.t1	0.00036	40.4318
GBP73352.1	Neurogenic locus Notch protein [Eumeta japonica]	g22338.t1	0.00038	40.817
GBP33478.1	Protein numb [Eumeta japonica]	g1621.t1	0.0004	38.5058
XP_026321774.1	calcium-activated potassium channel slowpoke isoform X11 [Hyposmocoma kahamanoa]	g15390.t1	0.000403	38.891
XP_021197962.1	neurogenic locus notch homolog protein 1 [Helicoverpa armigera]	g14098.t1	0.000415	34.2686
AIB07904.1	Hox cluster protein Dfd [Pararge aegeria]	g5114.t1	0.000441	35.039
XP_022117265.1	protein cortex [Pieris rapae]	g25882.t1	0.000444	40.0466
XP_022116239.1	transient receptor potential channel pyrexia isoform X2 [Pieris rapae]	g6113.t1	0.000446	40.817
AQM32559.1	hox protein pb [Dendrolimus punctatus]	g16116.t1	0.000466	37.7354
OWR44146.1	spalt protein [Danaus plexippus plexippus]	g7508.t1	0.000467	36.5798
OWR44146.1	spalt protein [Danaus plexippus plexippus]	g2856.t1	0.000477	39.2762
GBP33478.1	Protein numb [Eumeta japonica]	g27785.t1	0.000479	39.2762
XP_021195084.1	neurogenic locus Notch protein isoform X4 [Helicoverpa armigera]	g8379.t1	0.000486	38.5058
GBO98634.1	Ectoderm-neural cortex protein 1 [Eumeta japonica]	g29728.t1	0.000486	36.965
XP_026332169.1	mothers against decapentaplegic homolog 4 [Hyposmocoma kahamanoa]	g12916.t1	0.000493	38.1206
XP_011569112.1	PREDICTED: neurogenic locus Notch protein [Plutella xylostella]	g14481.t1	0.000495	34.6538
OWR44146.1	spalt protein [Danaus plexippus plexippus]	g5564.t1	0.000547	37.7354
XP_026324000.1	neurogenic locus Notch protein isoform X4 [Hyposmocoma kahamanoa]	g27106.t1	0.000549	38.1206
OWR44146.1	spalt protein [Danaus plexippus plexippus]	g25755.t1	0.000549	39.2762
OWR44146.1	spalt protein [Danaus plexippus plexippus]	g10190.t1	0.00056	35.039
OWR44146.1	spalt protein [Danaus plexippus plexippus]	g21428.t1	0.000566	38.5058
AIB07879.1	Hox cluster protein ShxA [Cameraria ohridella]	g21085.t1	0.000587	37.3502
AIB07904.1	Hox cluster protein Dfd [Pararge aegeria]	g20549.t1	0.000605	33.113
KPJ14564.1	Neurogenic locus Notch protein [Papilio machaon]	g14288.t1	0.000607	34.6538
OWR44543.1	Transmembrane and coiled-coil domain-containing protein 7 [Danaus plexippus plexippus]	g35752.t1	0.00061	36.965
XP_028160039.1	transient receptor potential channel pyrexia isoform X3 [Ostrinia furnacalis]	g26362.t1	0.000613	33.113
XP_026736064.1	homeobox protein engrailed [Trichoplusia ni]	g26029.t1	0.000641	33.113
XP_026736064.1	homeobox protein engrailed [Trichoplusia ni]	g32148.t1	0.000641	33.113
XP_026736064.1	homeobox protein engrailed [Trichoplusia ni]	g32831.t1	0.000652	35.039
GBO98634.1	Ectoderm-neural cortex protein 1 [Eumeta japonica]	g30886.t1	0.000653	36.1946
OWR44146.1	spalt protein [Danaus plexippus plexippus]	g19709.t1	0.000658	37.3502
OWR44146.1	spalt protein [Danaus plexippus plexippus]	g19358.t1	0.000675	36.1946
XP_023946720.1	neurogenic locus Notch protein isoform X2 [Bicyclus anynana]	g23369.t1	0.000676	36.5798
XP_011569112.1	PREDICTED: neurogenic locus Notch protein [Plutella xylostella]	g4181.t1	0.000679	38.891
XP_023953379.1	neurogenic locus notch homolog protein 1 isoform X1 [Bicyclus anynana]	g24070.t1	0.000691	38.891
OWR44146.1	spalt protein [Danaus plexippus plexippus]	g8881.t1	0.000697	40.4318
KPJ08921.1	Transient receptor potential channel pyrexia [Papilio machaon]	g25097.t1	0.0007	36.5798
KOB71274.1	Apterous B beta [Operophtera brumata]	g23942.t1	0.00071	34.2686
XP_021195081.1	neurogenic locus Notch protein isoform X1 [Helicoverpa armigera]	g5576.t1	0.000714	38.5058
OWR44146.1	spalt protein [Danaus plexippus plexippus]	g36203.t1	0.000738	37.3502
AQM32559.1	hox protein pb [Dendrolimus punctatus]	g26659.t1	0.000739	37.7354
XP_026493686.1	protein naked cuticle homolog [Vanessa tameamea]	g33079.t1	0.000765	35.8094
XP_026493686.1	protein naked cuticle homolog [Vanessa tameamea]	g20201.t1	0.000765	35.8094
XP_023946720.1	neurogenic locus Notch protein isoform X2 [Bicyclus anynana]	g21581.t1	0.000775	39.2762
AEP43793.2	black [Biston betularia]	g33436.t1	0.000791	38.1206
BAK19077.1	apterous B alpha [Bombyx mori]	g3669.t2	0.000804	34.6538
BAK19077.1	apterous B alpha [Bombyx mori]	g29418.t3	0.000804	34.6538
BAK19077.1	apterous B alpha [Bombyx mori]	g32833.t3	0.000804	34.6538
XP_011563089.1	PREDICTED: neurogenic locus notch homolog protein 3-like [Plutella xylostella]	g23808.t1	0.00083	36.5798
AIB07881.1	Hox protein Dfd [Callimorpha dominula]	g33683.t1	0.000834	35.039
KPI94668.1	Zinc finger CCCH domain-containing protein 13 [Papilio xuthus]	g16156.t1	0.000849	37.7354
XP_026501079.1	neurogenic locus Notch protein [Vanessa tameamea]	g33968.t1	0.000861	37.3502
KPJ12285.1	Zinc finger CCCH domain-containing protein 13 [Papilio machaon]	g8986.t1	0.000876	35.039
OWR44146.1	spalt protein [Danaus plexippus plexippus]	g10703.t1	0.000893	37.3502
XP_013164697.1	PREDICTED: calcium-activated potassium channel slowpoke isoform X6 [Papilio xuthus]	g35430.t1	0.000895	38.891
KPJ12285.1	Zinc finger CCCH domain-containing protein 13 [Papilio machaon]	g22616.t1	0.000911	38.5058
OWR44146.1	spalt protein [Danaus plexippus plexippus]	g15747.t1	0.00095	38.891
OWR44146.1	spalt protein [Danaus plexippus plexippus]	g9785.t1	0.000994	33.4982
